# Supplementary material for: High-voltage cycling degradation mechanisms of the NaNi 1/3 Fe 1/3 Mn 1/3 O 2 cathode in sodium-ion pouch cells
Source: Royal Society of Chemistry journal article supplement (doi:10.1039/d5eb00077g), 2025-01-01
Supplement: d5eb00077g1.pdf [file d5eb00077g1.pdf]

## Supplementary Information

### High-voltage degradation mechanism of $\text{NaNi}_{1/3}\text{Fe}_{1/3}\text{Mn}_{1/3}\text{O}_2$ cathode in cycling pouch batteries

Shini Lin <sup>a</sup>, Wei Li <sup>a</sup>, Huiya Yang <sup>a</sup>, Minghui Chen <sup>a</sup>, Honghao Xie <sup>a</sup>, Yuan Qin <sup>a</sup>, Jing Zeng <sup>\*a</sup>,  
Peng Zhang <sup>\*b</sup> and Jinbao Zhao <sup>\*a</sup>

a. State-Province Joint Engineering Laboratory of Power Source Technology for New Energy Vehicle, State Key Laboratory of Physical Chemistry of Solid Surfaces, Engineering Research Center of Electrochemical Technology, Collaborative Innovation Center of Chemistry for Energy Materials, College of Chemistry and Chemical Engineering, Ministry of Education, Xiamen University, Xiamen 361005, China

b. College of Energy & School of Energy Research, Xiamen University, Xiamen 361102, China

† Electronic supplementary information (ESI) available. See DOI: 10.1039/x0xx00000x

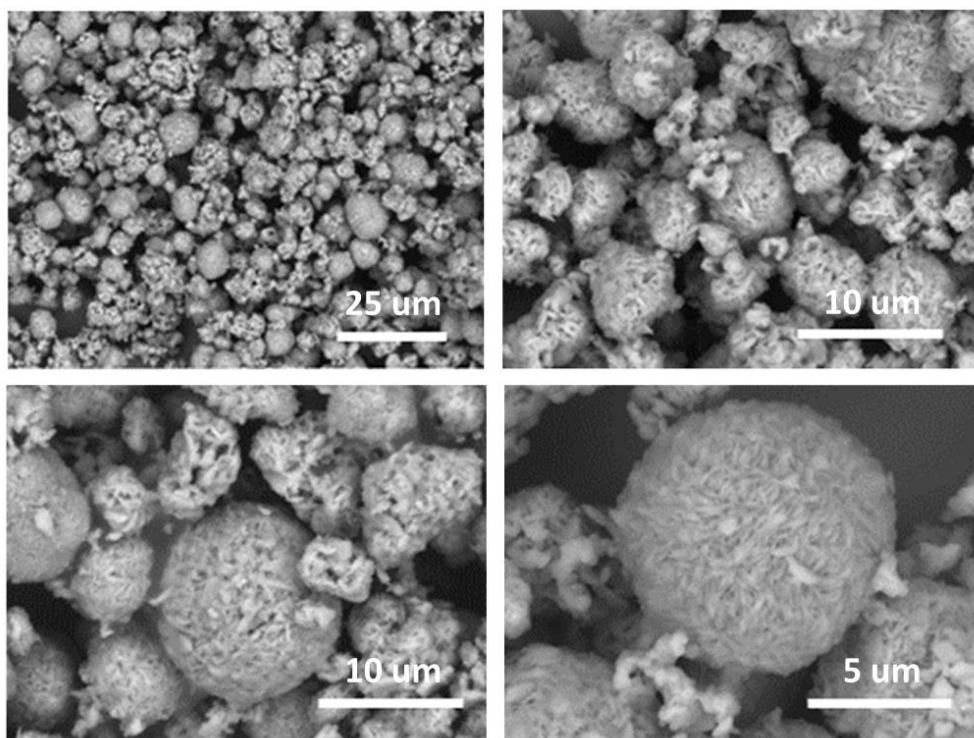

**Fig. S1** SEM images of NFM.

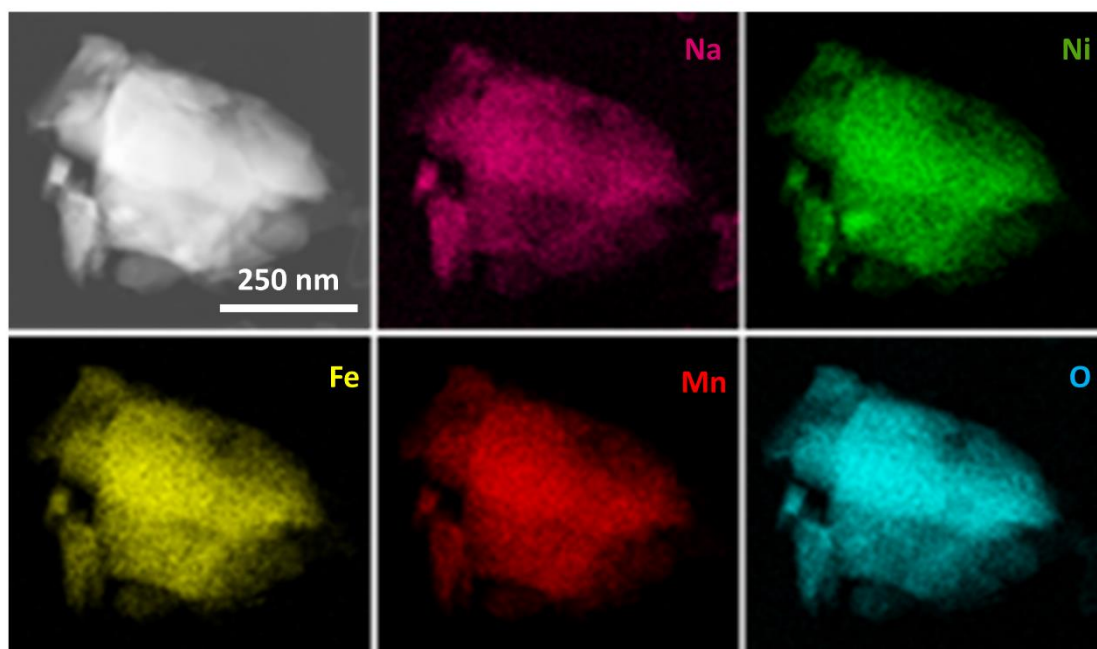

**Fig. S2** TEM and elemental mapping images of NFM.

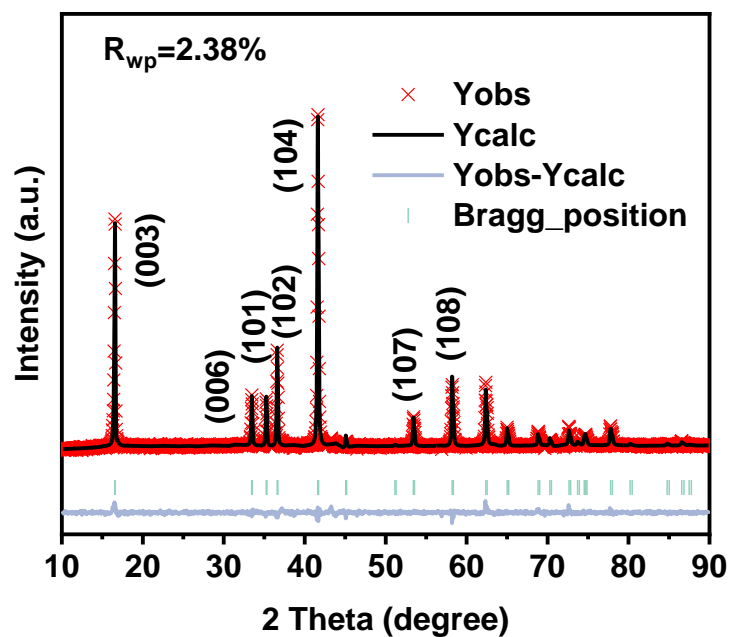

**Fig. S3** XRD pattern of NFM. NFM has a hexagonal  $O3\text{-NaFeO}_2$  structure with  $R\bar{3}m$  space group, and the Bragg peak at  $16.53^\circ$  corresponds to the  $\text{TMO}_6$  slabs ( $d_{(003)}$ ) with 0.536 nm spacing which indicates the size of  $\text{Na}^+$  transport channel.

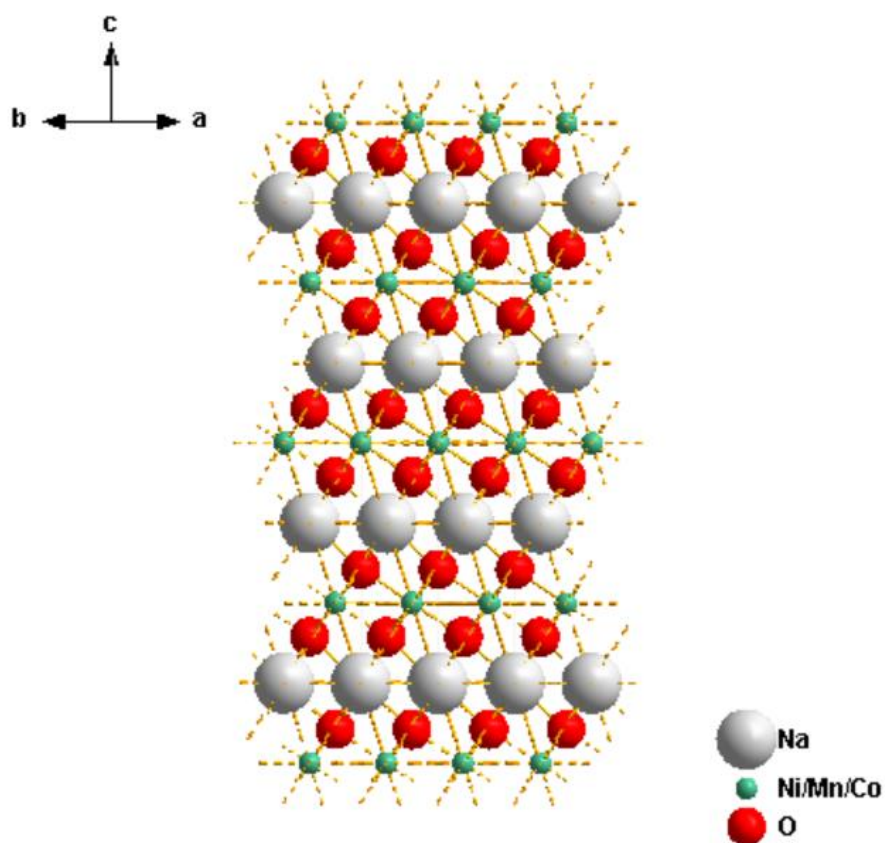

**Fig. S4** Structure model of NFM.

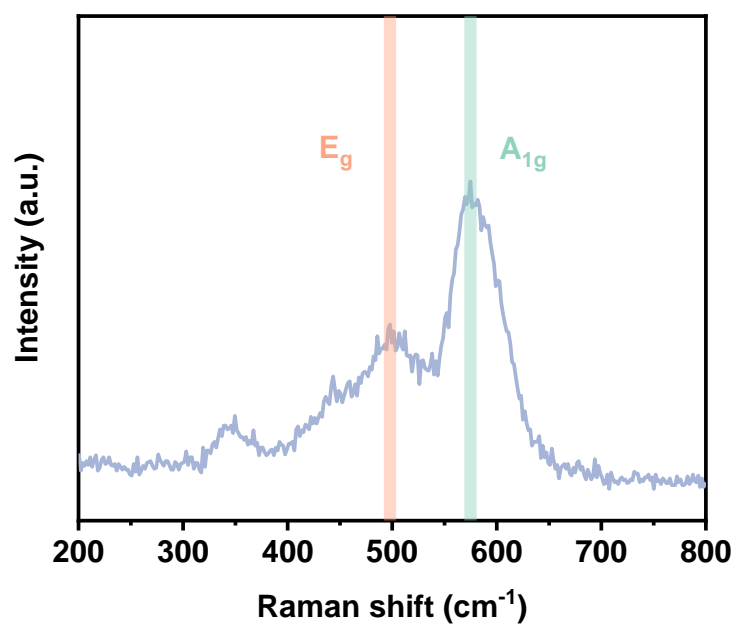

**Fig. S5** Raman spectrum of NFM. The two Raman peaks at 498  $\text{cm}^{-1}$  ( $E_g$ ) and 575  $\text{cm}^{-1}$  ( $A_{1g}$ ) correspond to the bending vibration and stretching vibration of TM-O bonds respectively.

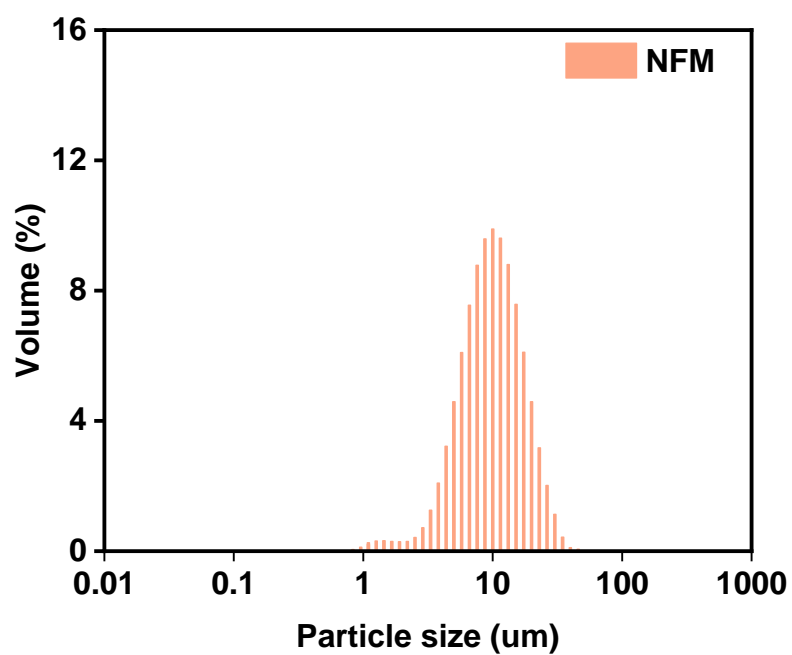

**Fig. S6** Particle-size distribution of NFM through laser analysis ( $D_{50}=10.2\ \mu\text{m}$ ).

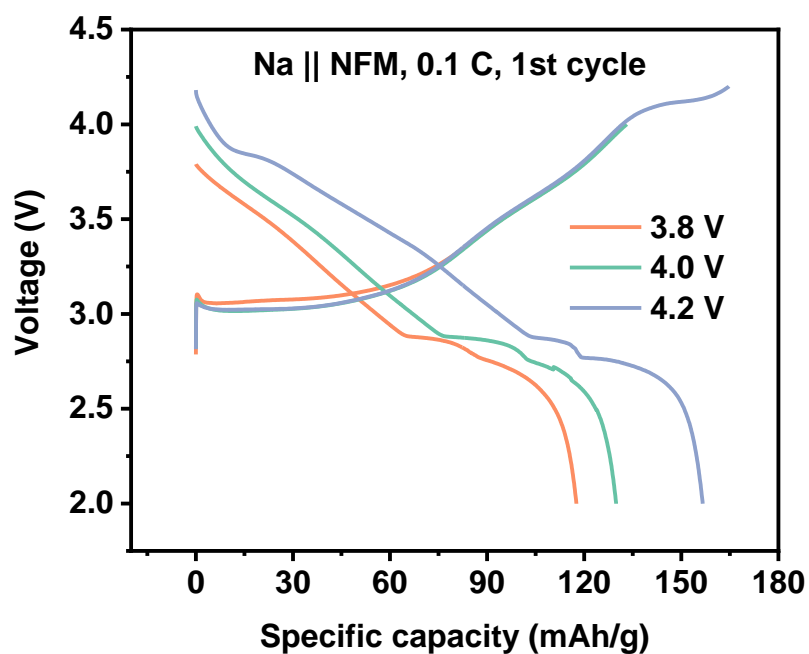

**Fig. S7** Galvanostatic charge/discharge curves of NFM at 0.1 C of the 1st cycle with 3.8 V, 4.0 V and 4.2 V upper voltages.

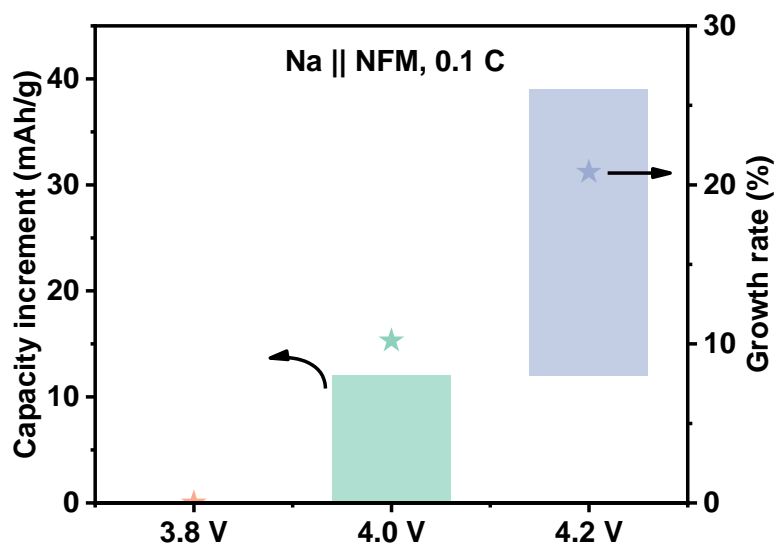

**Fig. S8** Capacity increment with the charging cut-off voltage increase of NFM. When the charging cut-off voltage increases from 4.0 V to 4.2 V, the high voltage plateau located at 4.12 V (charge)/3.85 V (discharge) appears contributing to the significant capacity increment, and the discharge voltage significantly rises, indicating the large energy increment at 4.2 V.

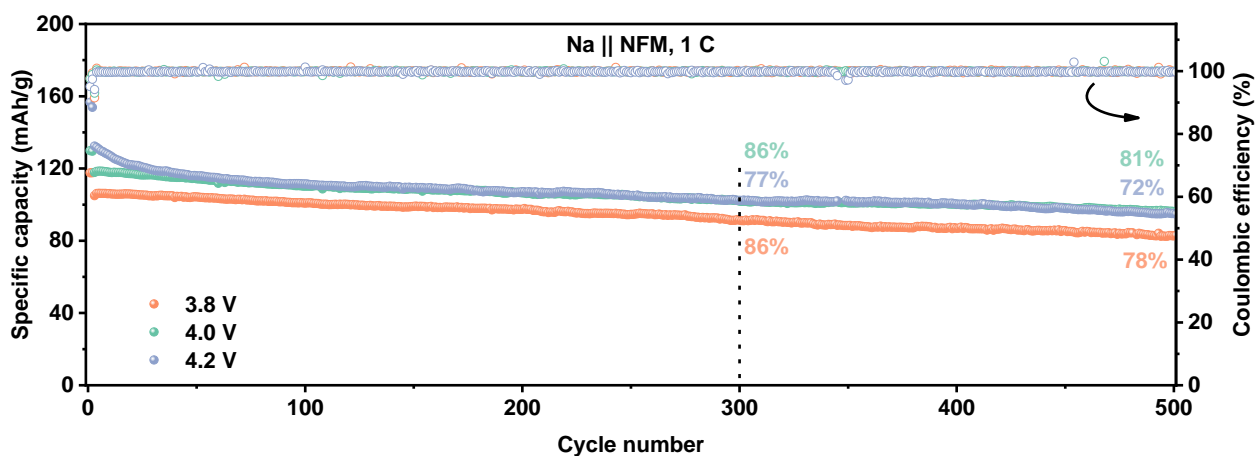

**Fig. S9** Cycling performance of NFM at different charging cut-off voltage. At 4.0 V upper voltage, NFM shows the best balance between high capacity and long cycle life.

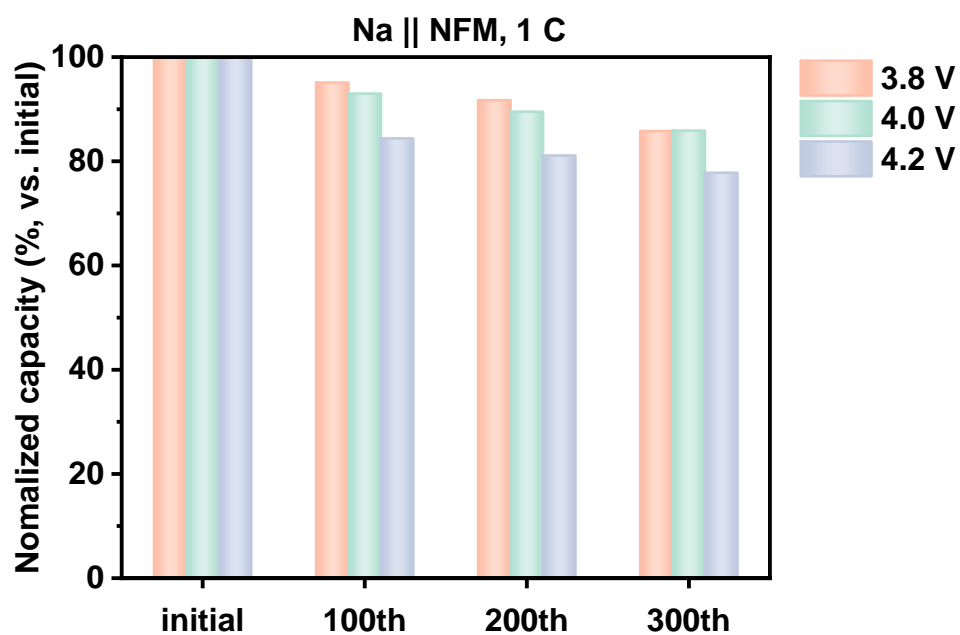

**Fig. S10** Remaining capacity ratio with the cycling for NFM at different charging cut-off voltage.

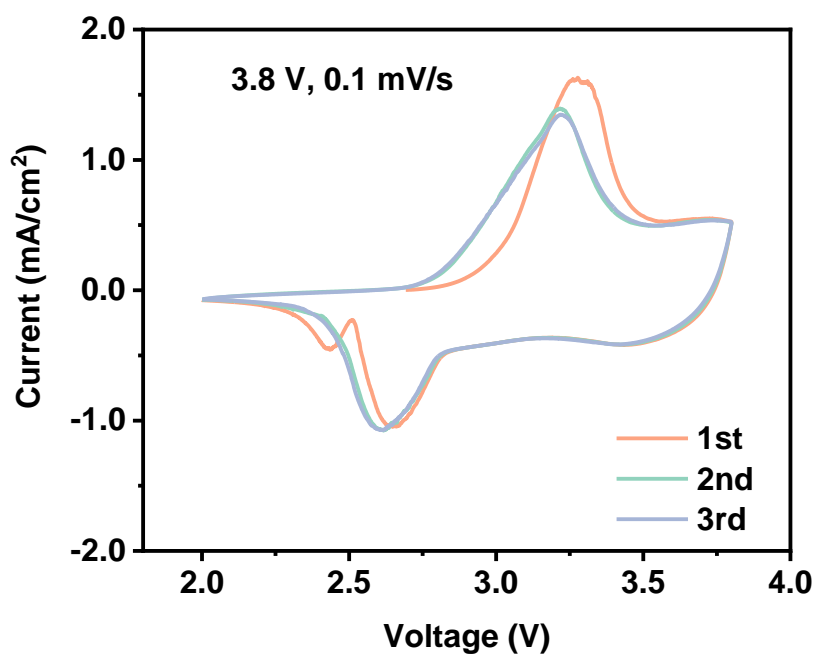

**Fig. S11** Cyclic voltammetry of NFM at 3.8 V cut-off voltage for 3 cycles.

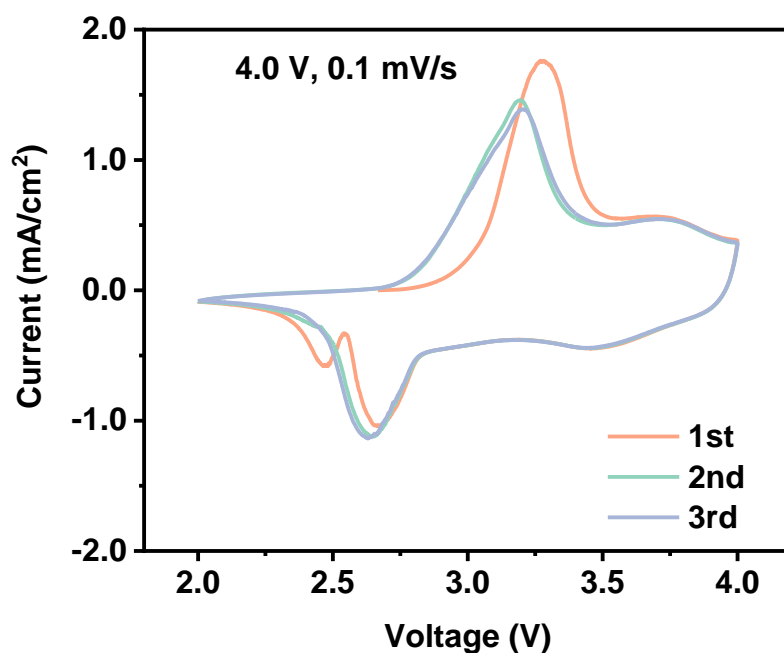

**Fig. S12** Cyclic voltammetry of NFM at 4.0 V cut-off voltage for 3 cycles.

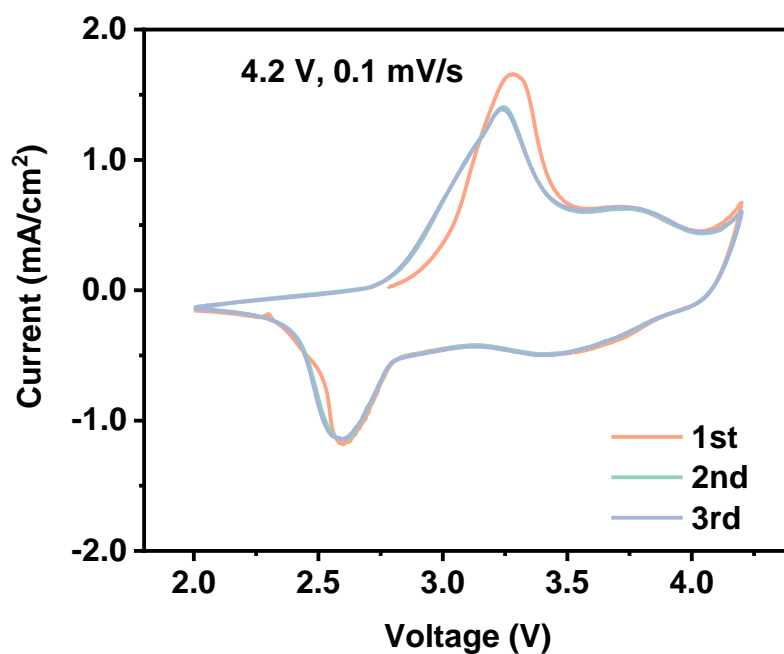

**Fig. S13** Cyclic voltammetry of NFM at 4.2 V cut-off voltage for 3 cycles.

CV results show two pairs of redox peaks at 3.28/2.64 V and 3.73/3.46 V attributed to the  $\text{Ni}^{2+}/\text{Ni}^{4+}$  and  $\text{Fe}^{3+}/\text{Fe}^{4+}$  redox couples respectively<sup>1</sup>, well matching the voltage plateau of galvanostatic charge/discharge curves. Notably, the oxidation peak near 4.2 V in Fig. S13 indicates the  $\text{Fe}^{3+}/\text{Fe}^{4+}$



redox reaction. When the charging cut-off voltage is under 4.0 V, the charge compensation is dominant by  $\text{Ni}^{2+}/\text{Ni}^{4+}$  via  $\text{Ni}^{3+}$  redox reaction. While for the charging voltage above 4.0 V, it is mainly dominant by  $\text{Fe}^{3+}/\text{Fe}^{4+}$  with slight  $\text{Ni}^{2+}/\text{Ni}^{4+}$ . The  $\text{Fe}^{3+}/\text{Fe}^{4+}$  redox reaction is accompanied with Jahn-Teller  $\text{Fe}^{4+}$  and Fe migration from TM slabs to Na slabs, causing the structural distortion and the harmful X and O3' phases shown in Fig. 3d.

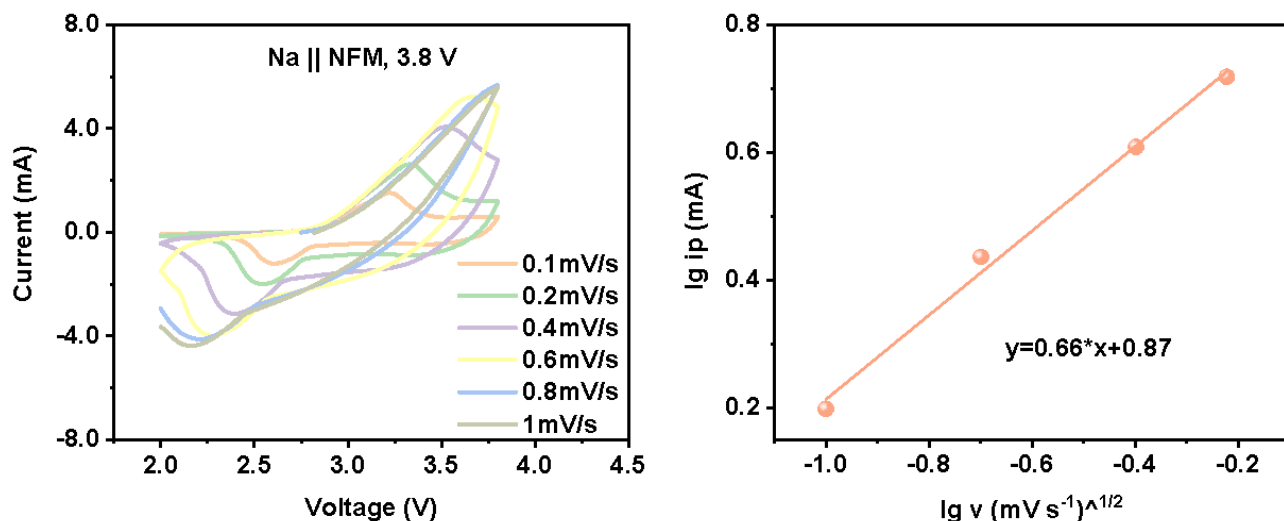

**Fig. S14** (a) Variable scan-rate CV curves and (b) linear fitting of  $\lg i_p \sim \lg v$  according to the oxidation peaks of initial NFM at 3.8 V cut-off voltage.

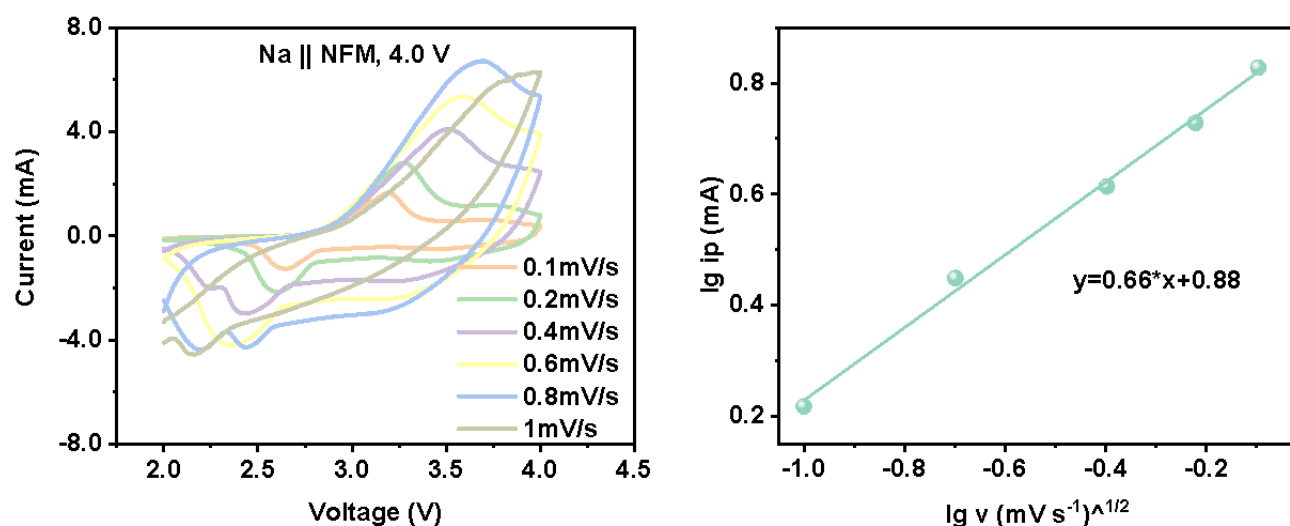

**Fig. S15** (a) Variable scan-rate CV curves and (b) linear fitting of  $\lg i_p \sim \lg v$  according to the oxidation peaks of initial NFM at 4.0 V cut-off voltage.

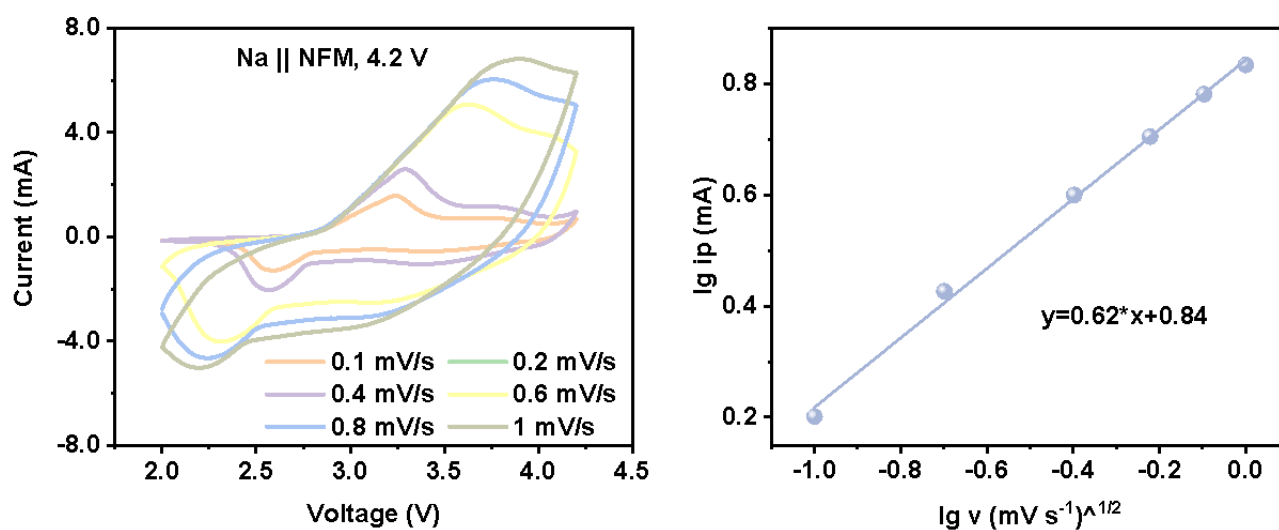

**Fig. S16** (a) Variable scan-rate CV curves and (b) linear fitting of  $\lg i_p \sim \lg v$  according to the oxidation peaks of initial NFM at 4.2 V cut-off voltage.

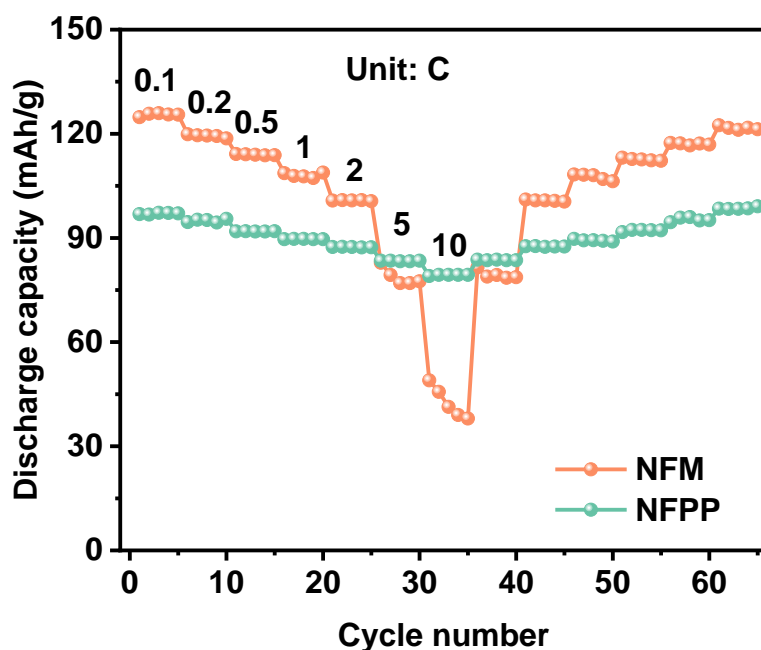

**Fig. S17** Rate performance of NFM (NFPP as the reference object).

According to formula 1, the reactions in NFM cathode is mainly  $\text{Na}^+$  diffusion-controlled and slightly capacitive-controlled which indicates the sluggish kinetics in NFM and results in poor rate performance (Fig. S14-17). Additionally, the  $\text{Na}^+$  diffusion behavior in NFM is independent of the increased charging cut-off voltage with the similar  $k$ .

$$i_p = k \times v^b$$

b=0.5, diffusion-controlled;

b=1, capacitive-controlled;

b=0.5~1, both controlled.

1

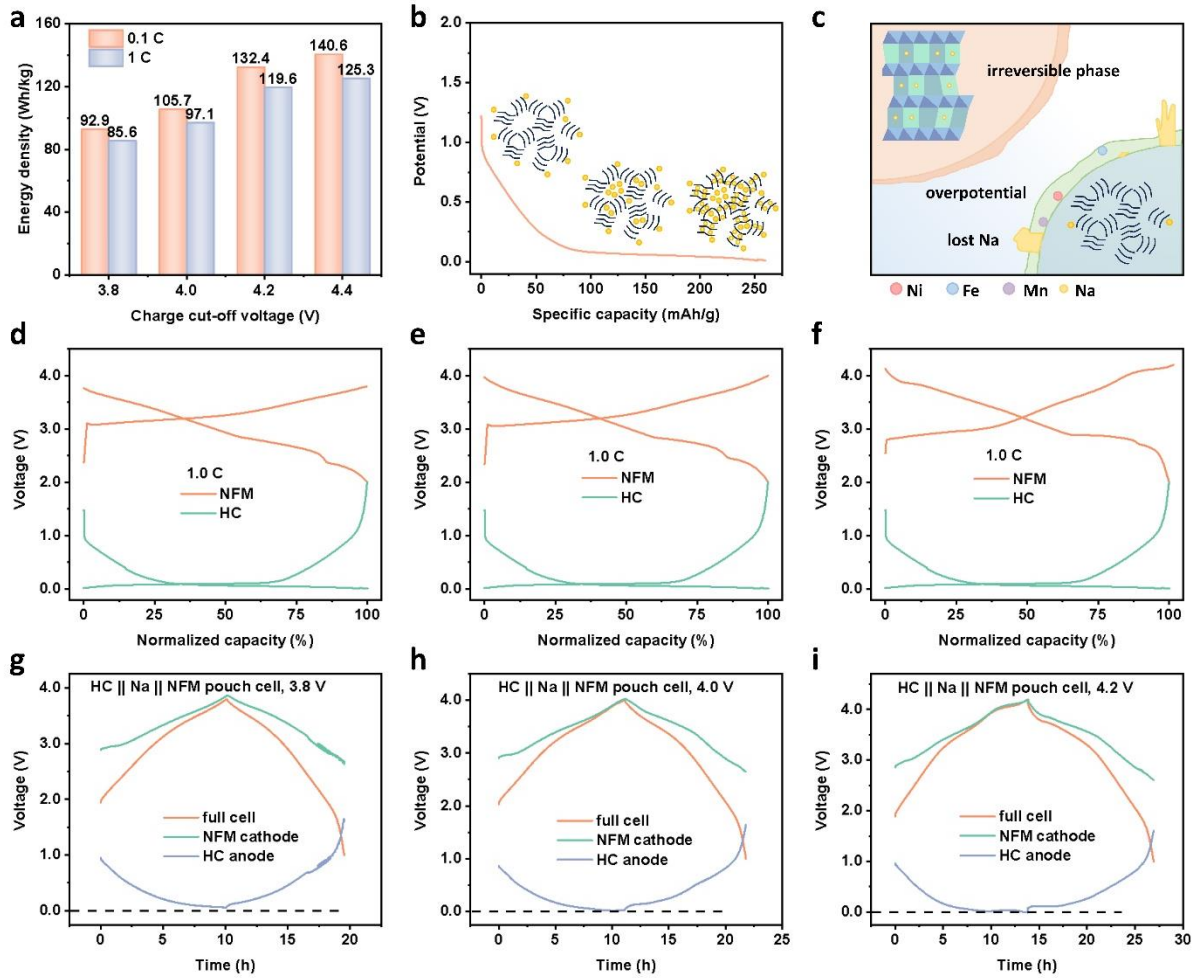

**Fig. S18** (a) Energy density increase with charging cut-off voltage increase of HC || NFM pouch battery. (b) Sodium storage mechanism of HC. (c) Structural transition of NFM cathode due to the Na loss on HC anode. (d-f) Normalized-capacity charge/discharge curves of NFM and HC with the upper voltage of NFM at 3.8 V, 4.0 V and 4.2 V respectively. (g-i) Potential change of NFM cathode, HC anode and full battery during charge and discharge through three-electrode pouch battery measurements, with 3.8 V, 4.0 V, and 4.2 V upper voltages respectively.

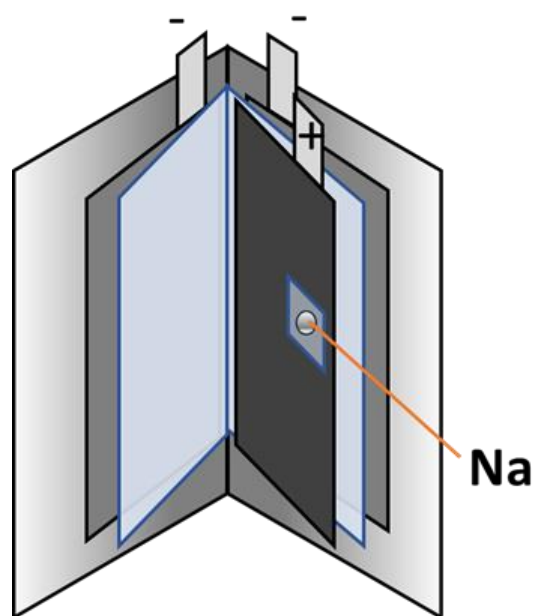

**Fig. S19** Schematic diagram of three-electrode pouch cell (HC | Na | NFM).

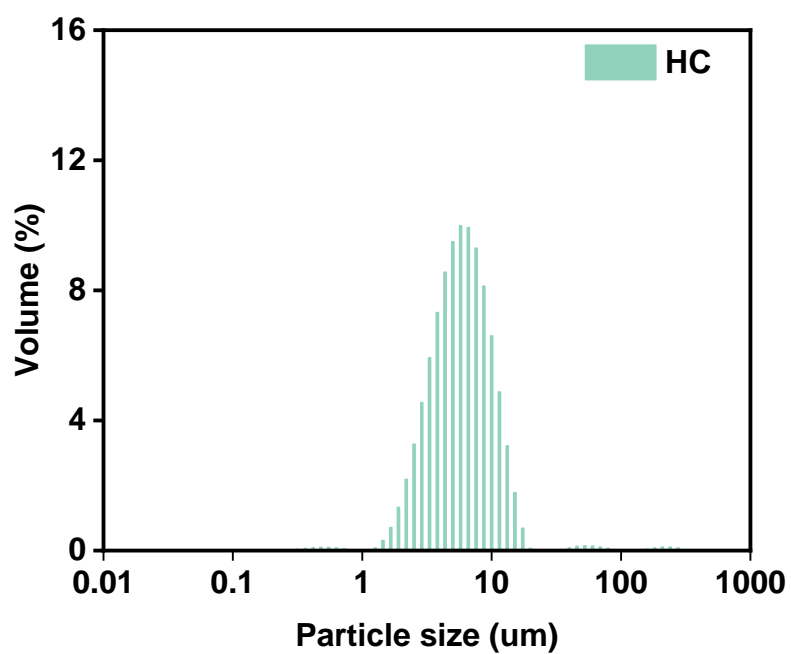

**Fig. S20** Particle-size distribution of HC through laser analysis ( $D_{50}=5.4\ \mu\text{m}$ ).

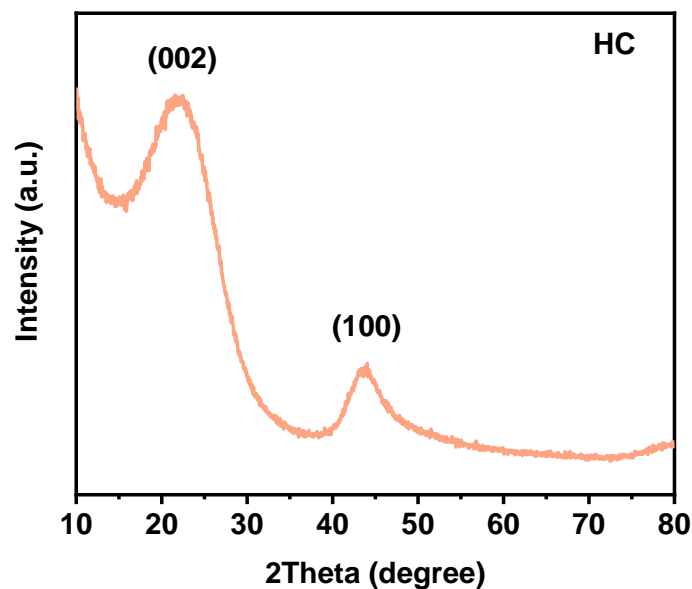

**Fig. S21** XRD pattern of HC (the two broad peaks at 22.2° (3.729 Å, spacing of carbon lamellas) and 43.9° correspond to the (002) and (100) lattice planes respectively and indicate the disordered amorphous carbon structure of HC <sup>2</sup>).

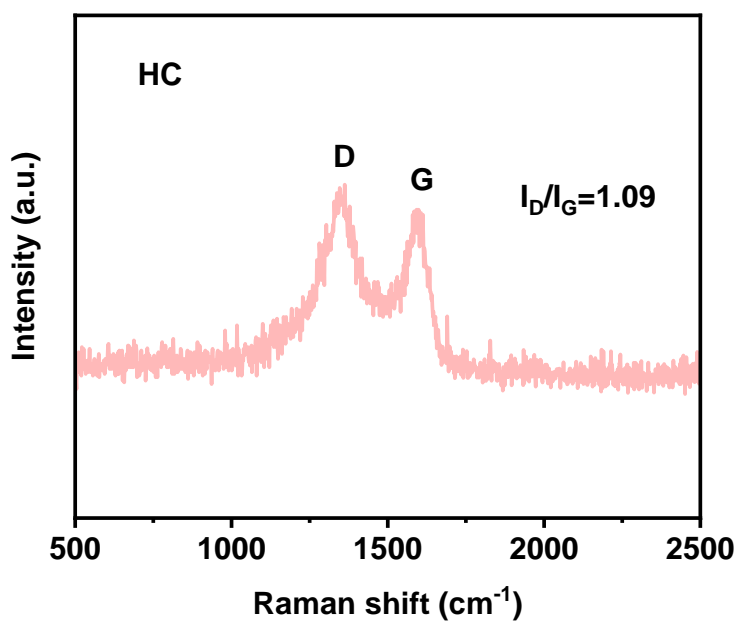

**Fig. S22** Raman spectrum of HC (D band (1350 cm<sup>-1</sup>) represents the A<sub>1g</sub> mode of sp<sup>2</sup> carbon induced by respiratory vibration in disordered or defective carbon, and G band (1580 cm<sup>-1</sup>) corresponds to the E<sub>2g</sub> mode of vibration ascribed to sp<sup>2</sup> carbon in graphite rings or chains <sup>3,4</sup>).

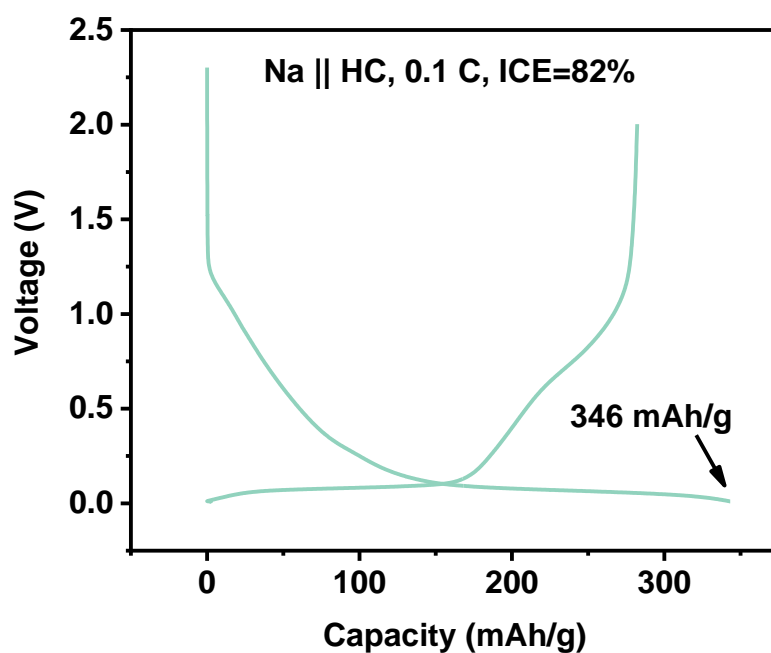

**Fig. S23** Galvanostatic charge/discharge curves of HC in the 1st cycle at 0.1 C (157.6 mAh/g in slope region (45.6%) and 188.2 mAh/g in plateau region (54.4%), and 81.6% initial coulombic efficiency (ICE) indicating the certain loss of Na<sup>+</sup> to form SEI).

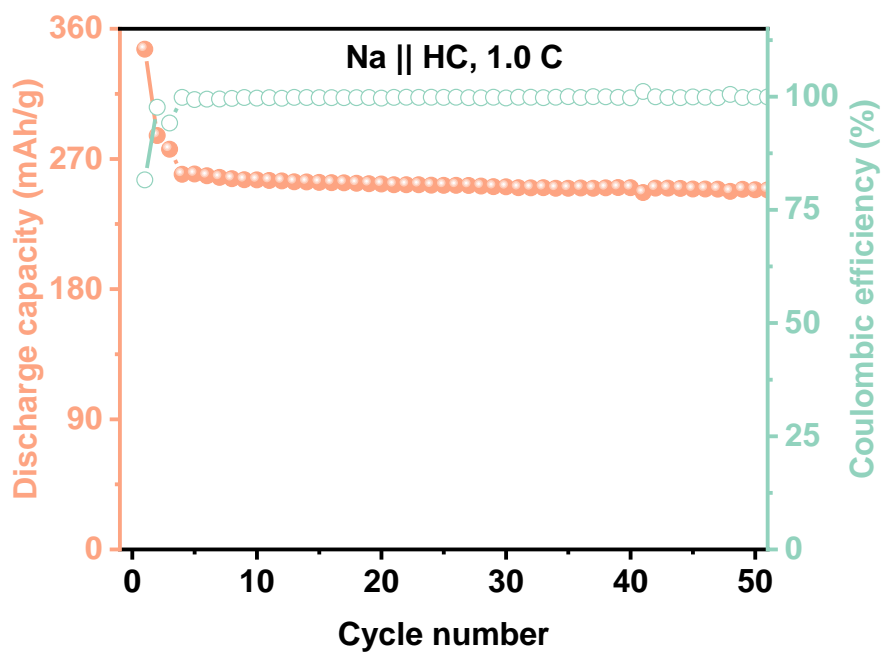

**Fig. S24** Cycling performance of HC at 1 C (96.1% capacity retention after 50 cycles due to SEI dissolution and regeneration).

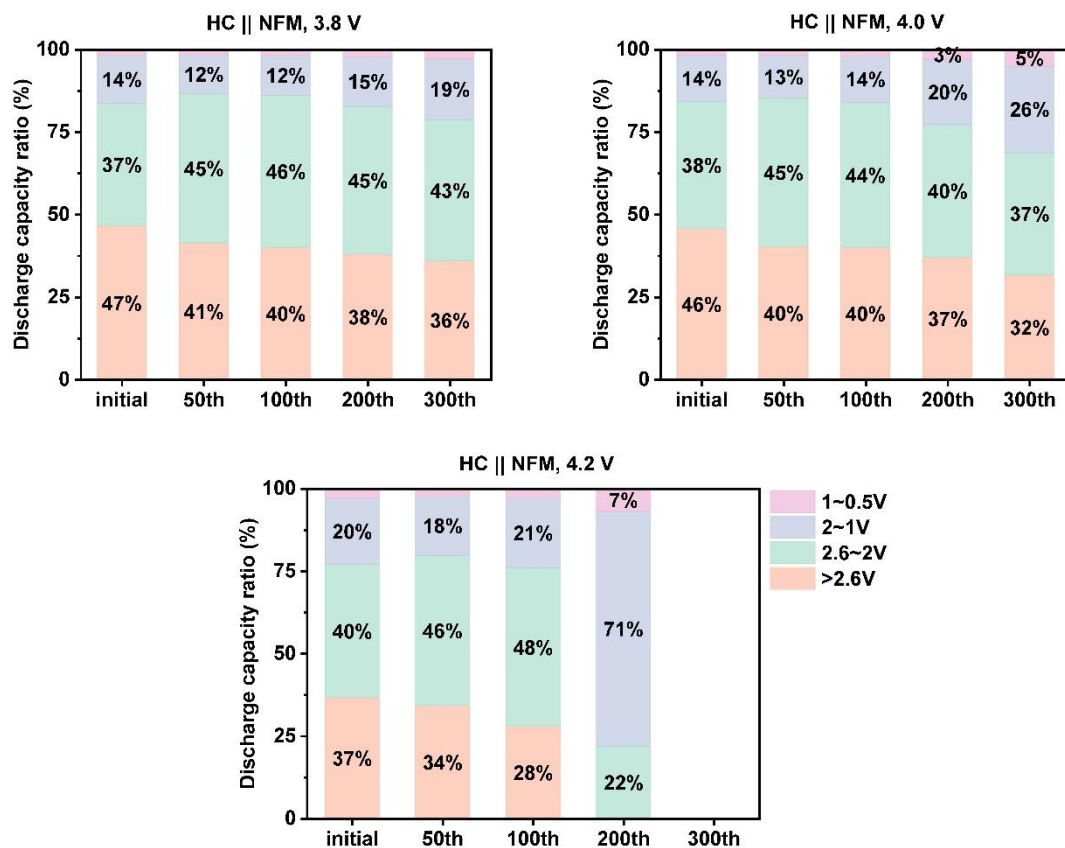

**Fig. S25** Capacity distribution versus voltage of HC || NFM full cell at selected cycles at 3.8 V, 4.0 V and 4.2 V upper voltage.

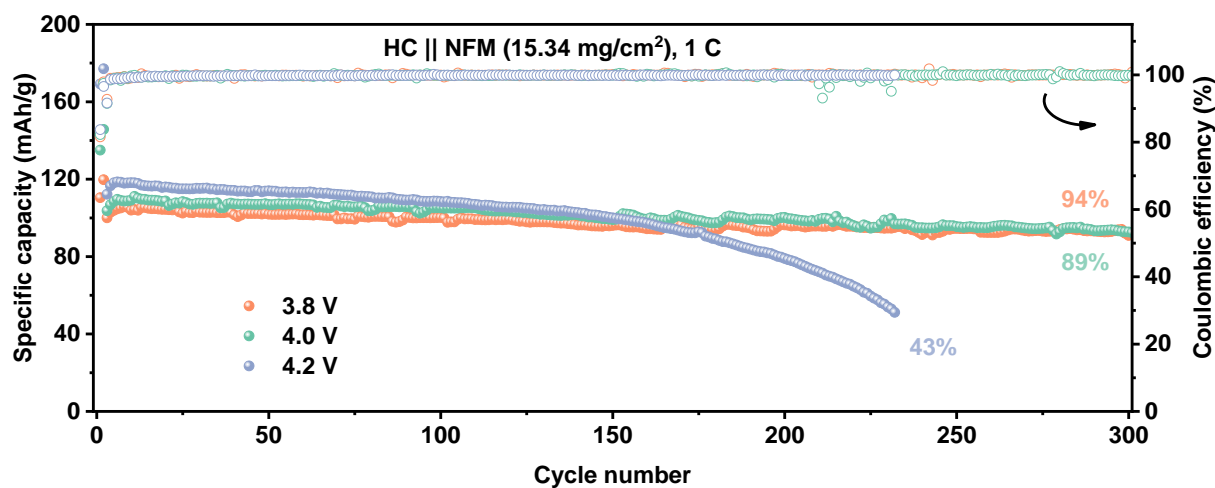

**Fig. S26** Cycling performance of HC || NFM full cell at 3.8 V, 4.0 V and 4.2 V upper voltage.

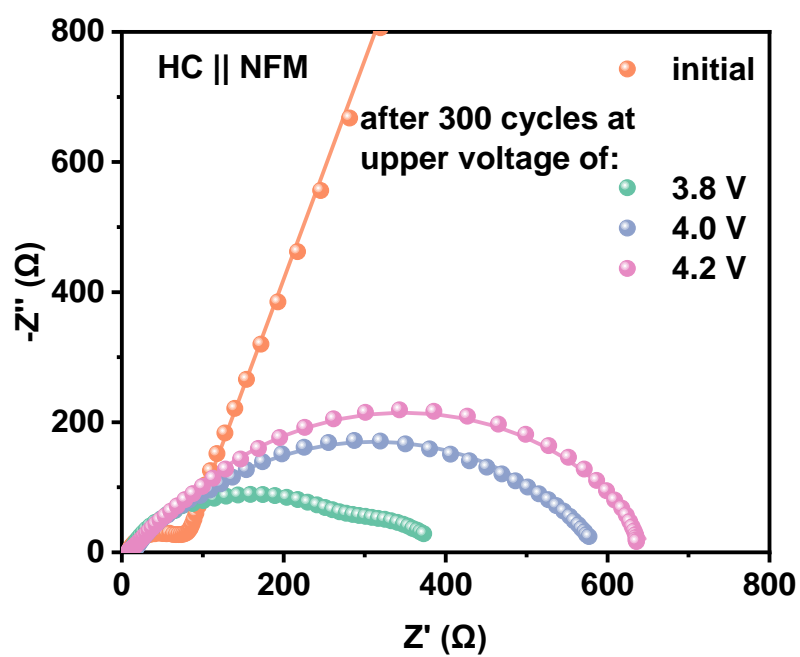

Fig. S27 EIS results of fresh and cycled HC || NFM cells.

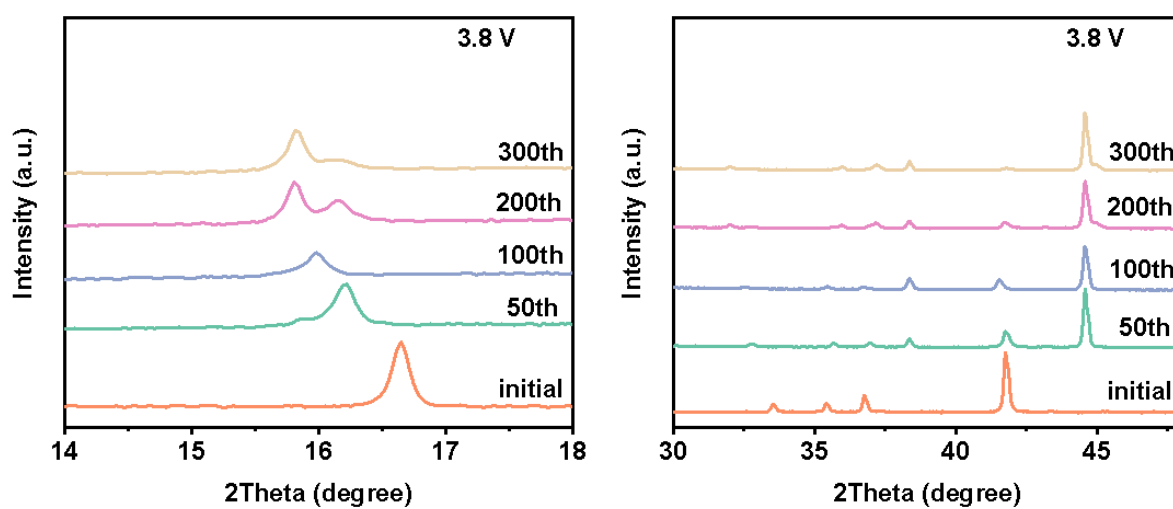

Fig. S28 Local post-mortem XRD patterns of NFM cathode from pouch cell cycling at 3.8 V.



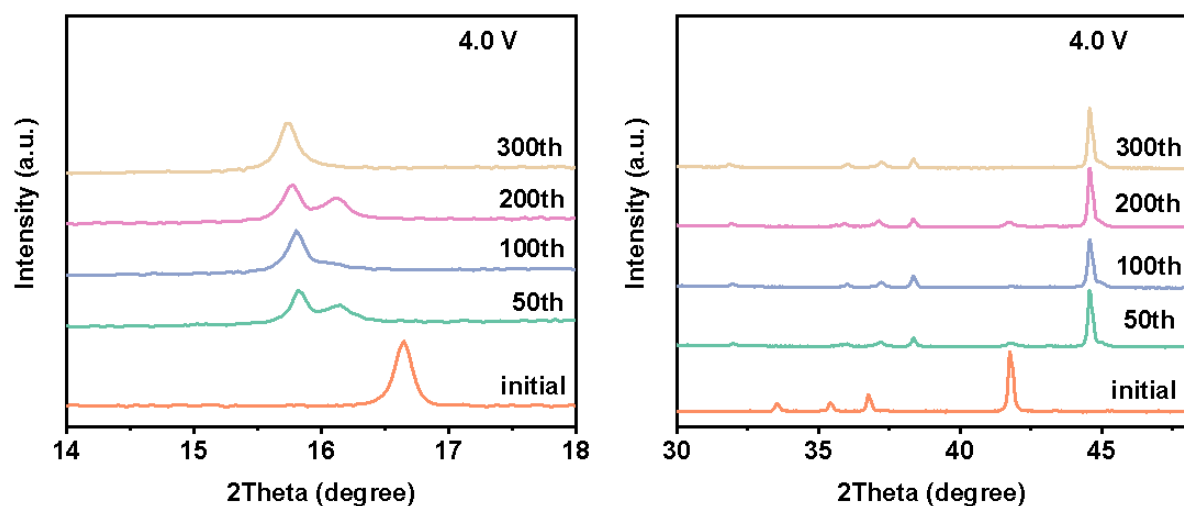

**Fig. S29** Local post-mortem XRD patterns of NFM cathode from pouch cell cycling at 4.0 V.

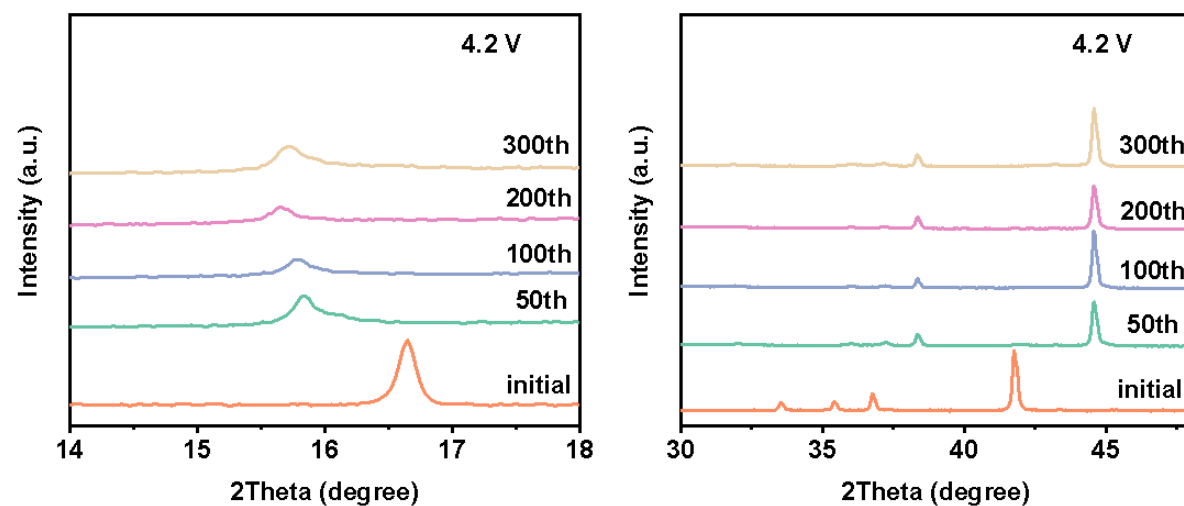

**Fig. S30** Local post-mortem XRD patterns of NFM cathode from pouch cell cycling at 4.2 V.

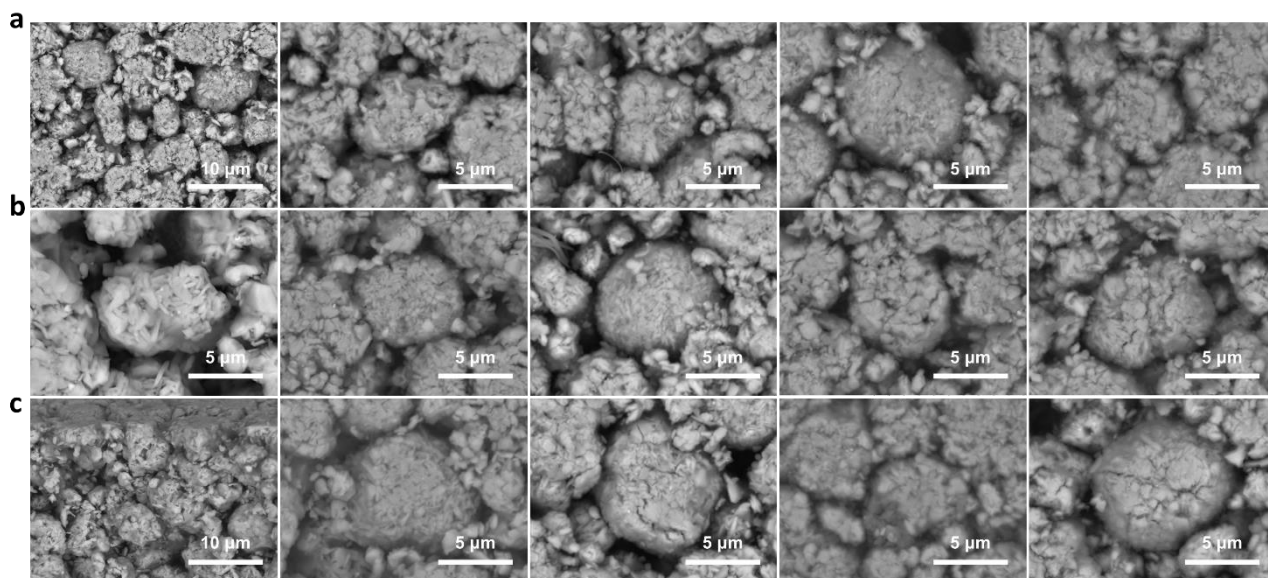

**Fig. S31** SEM images of NFM cathode cycling in full batteries at 3.8 V (a), 4.0 V (b) and 4.2 V (c). Each column from left to right is the initial, the 50th cycle, the 100th cycle, the 200th cycle, and the 300th cycle.

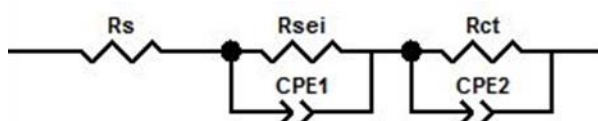

**Fig. S32** Equivalent circuit model of NFM cathode.

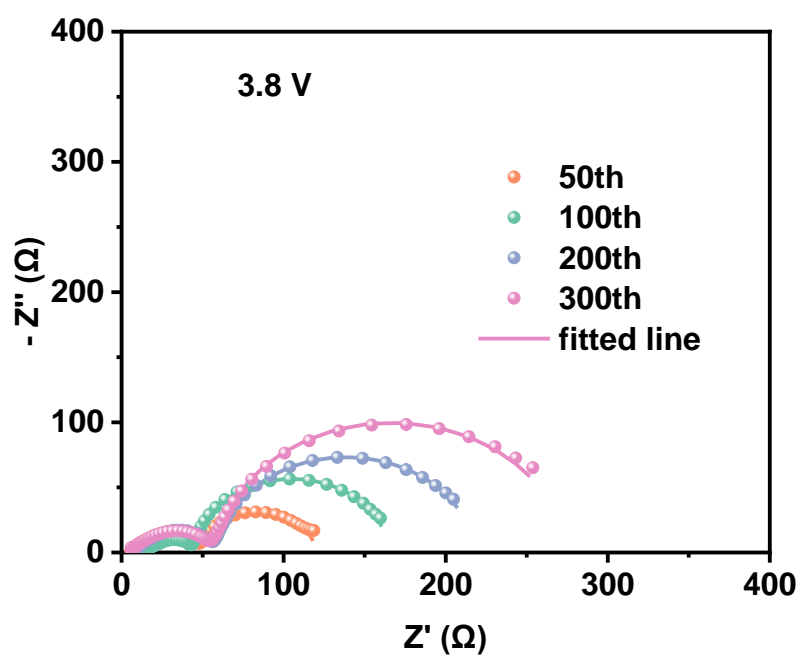

**Fig. S33** EIS of Na||NFM with cycling at 3.8 V upper voltage.

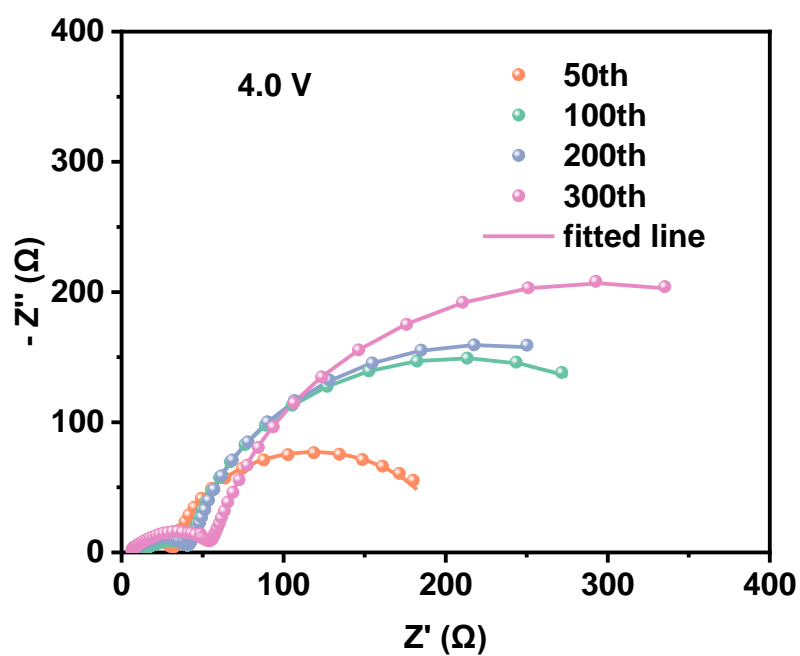

**Fig. S34** EIS of Na||NFM with cycling at 4.0 V upper voltage.

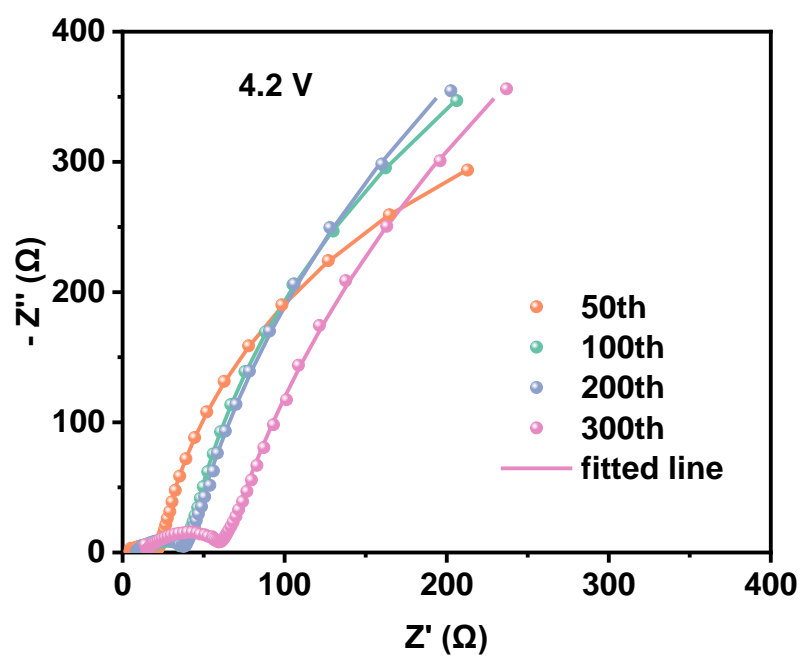

**Fig. S35** EIS of Na||NFM with cycling at 4.2 V upper voltage.

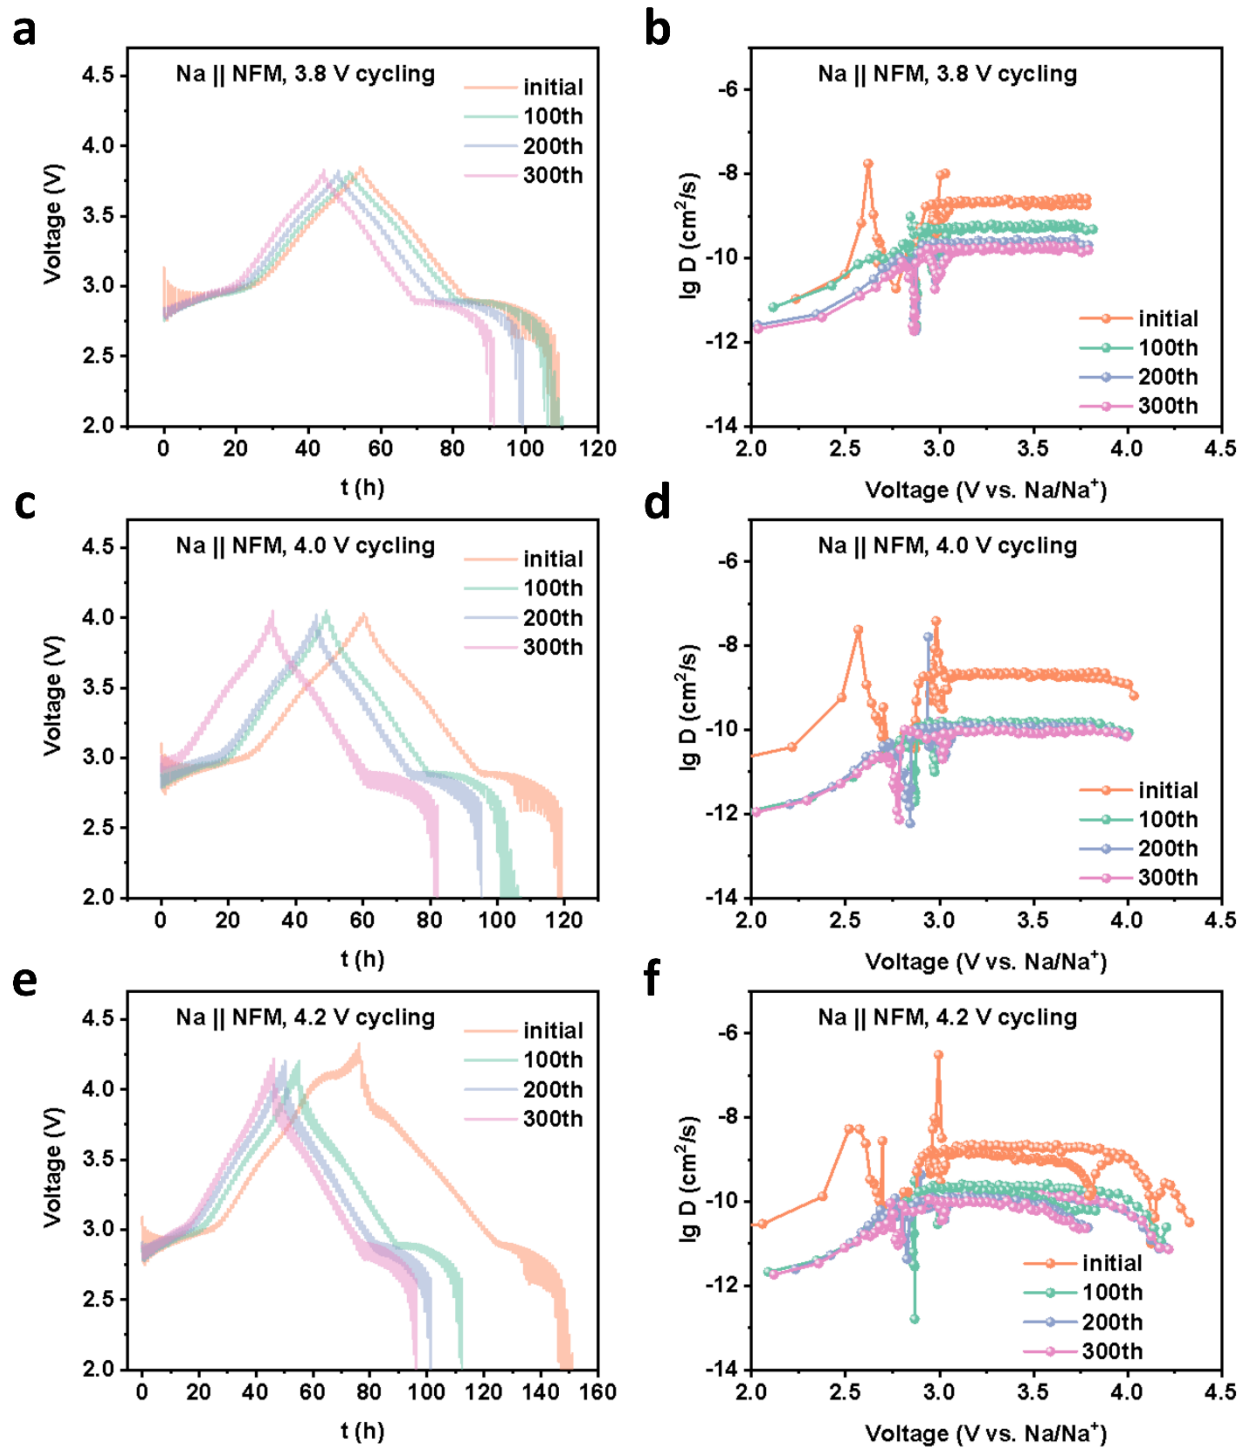

**Fig. S36** GITT and  $D_{\text{Na}^+}$  curves of NFM cathode cycling at (a, b) 3.8 V, (c, d) 4.0 V, and (e, f) 4.2 V upper voltages.

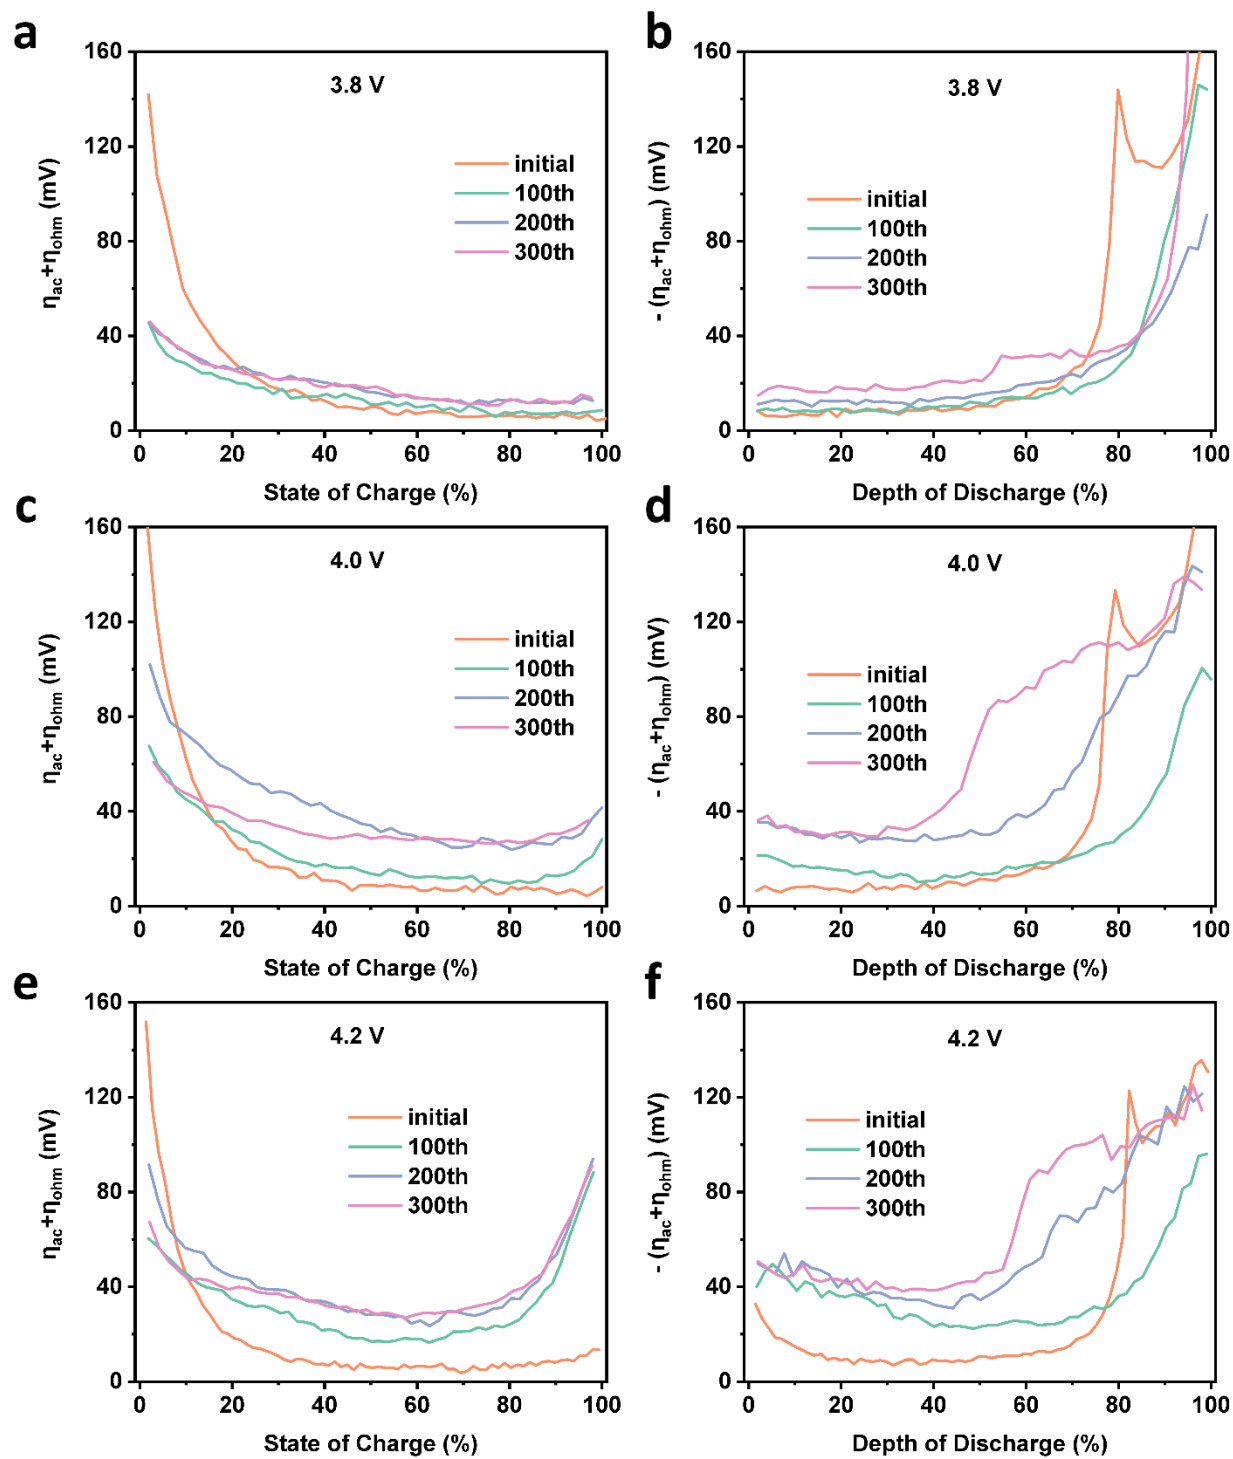

**Fig. S37** Activation polarization + ohmic polarization cycling at (a, b) 3.8 V, (c, d) 4.0 V and (e, f) 4.2 V upper voltages.

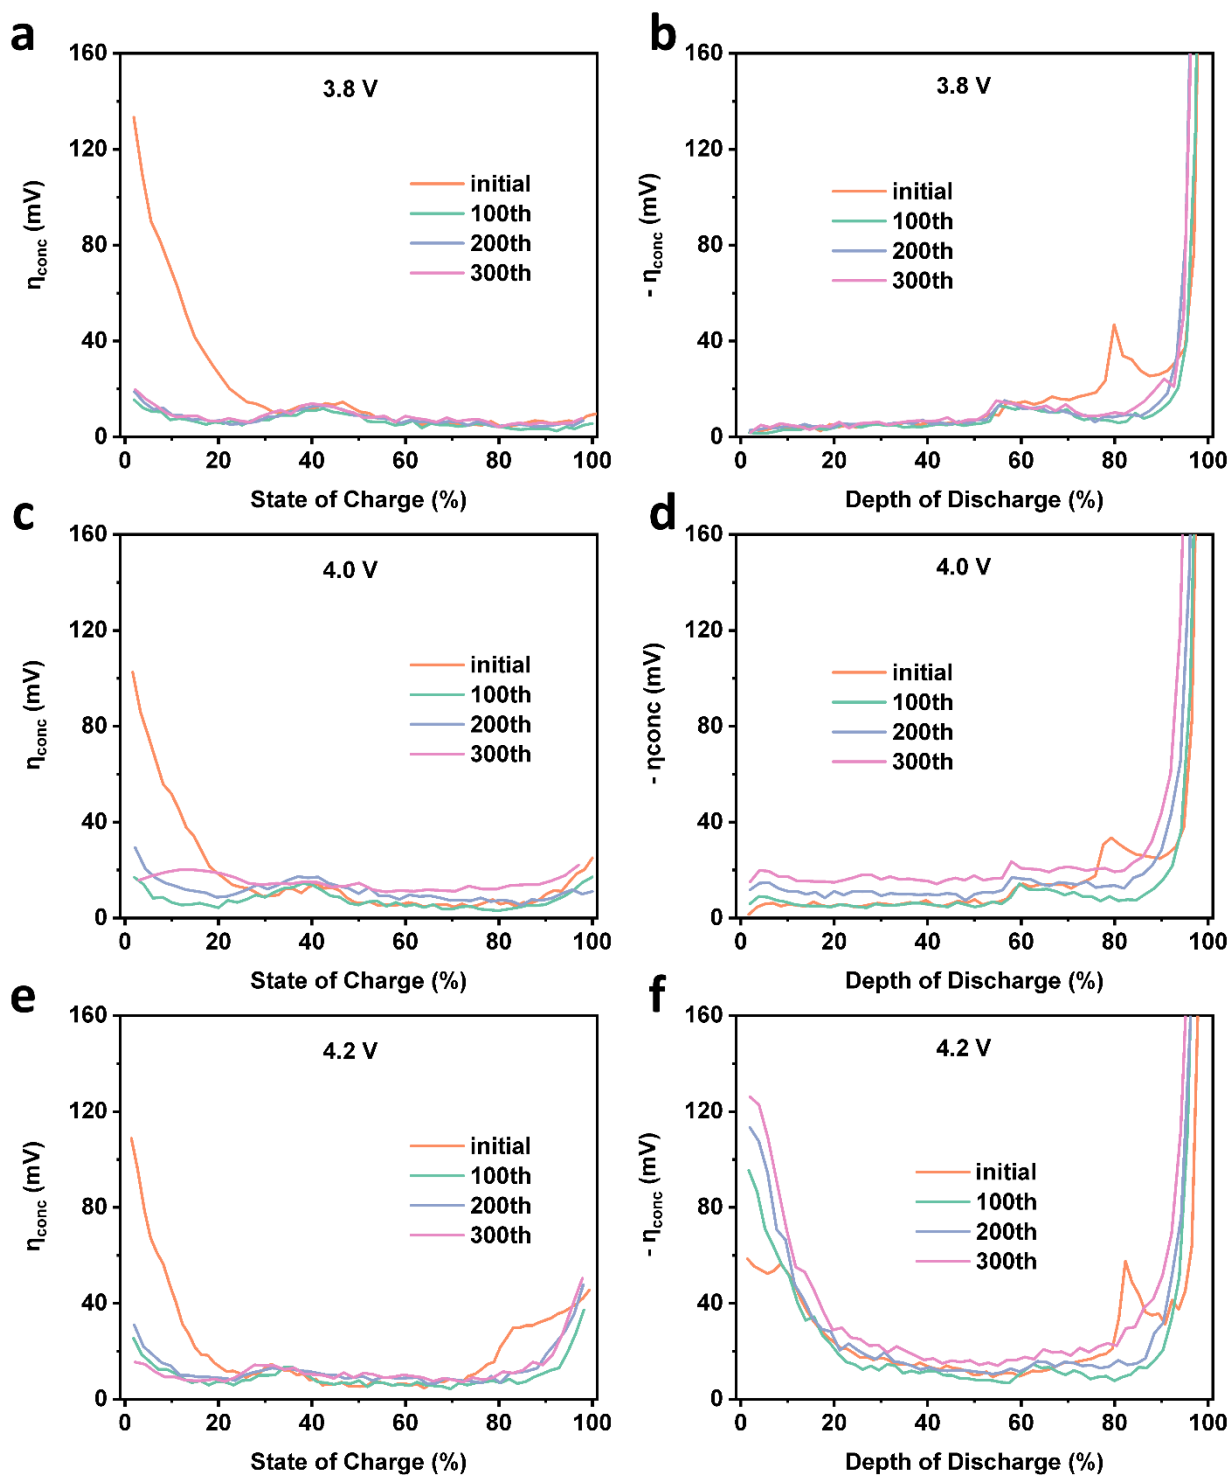

**Fig. S38** Concentration polarization with cycling at (a, b) 3.8 V, (c, d) 4.0 V and (e, f) 4.2 V upper voltages.

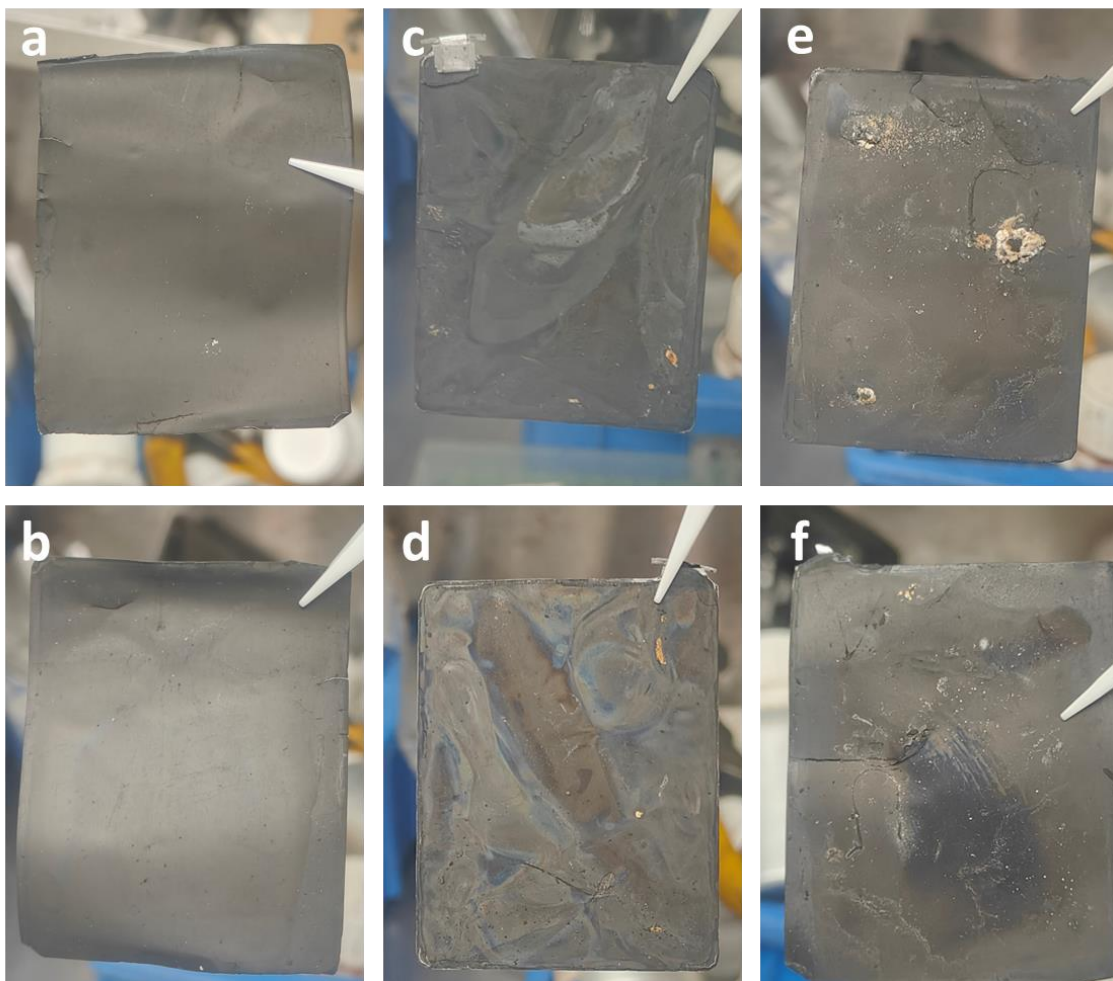

**Fig. S39** Optical images of HC anode from HC || NFM pouch cells after 300 cycles under (a-b) 3.8 V, (c-d) 4.0 V, and (e-f) 4.2 V charging cut-off voltages.



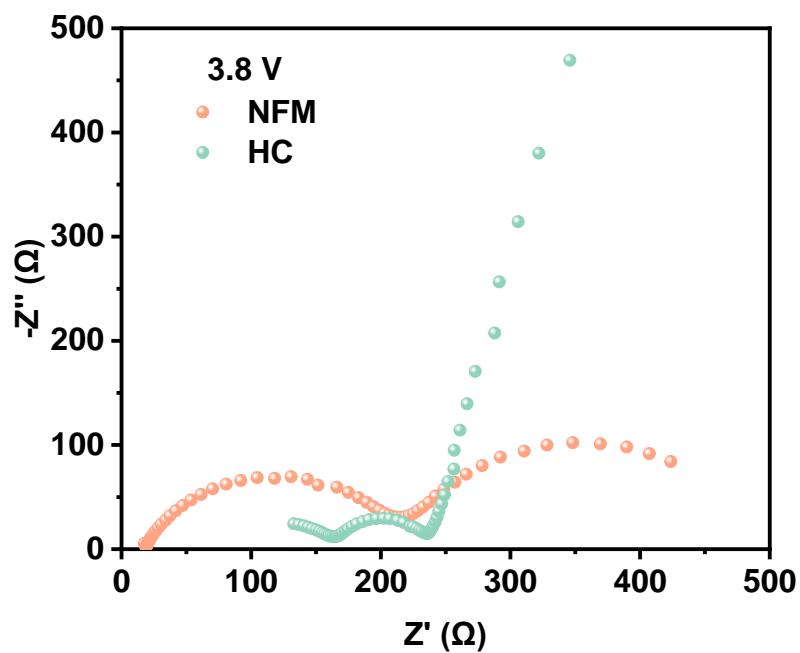

**Fig. S40** EIS results of Na || NFM and Na || HC half cells (the NFM and HC electrodes were from the pouch cell after cycling at 3.8 V upper voltage).

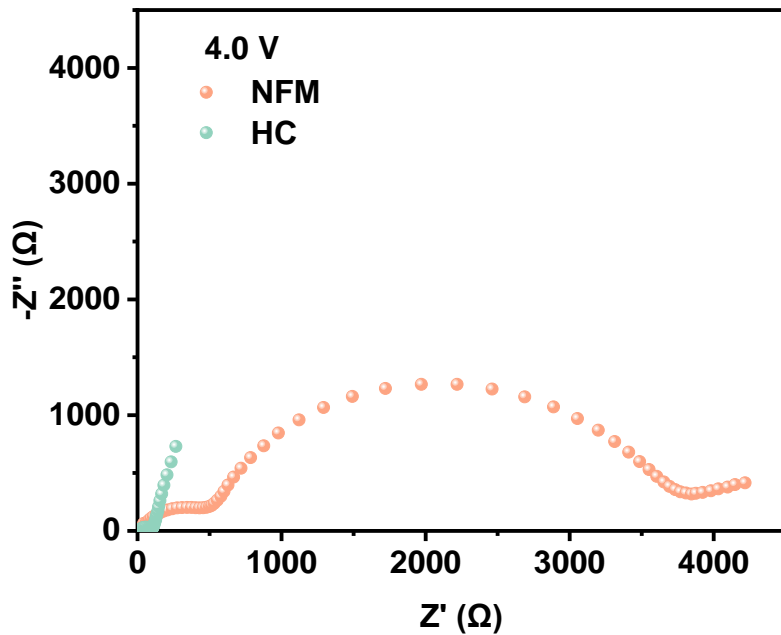

**Fig. S41** EIS results of Na || NFM and Na || HC half cells (the NFM and HC electrodes were from the pouch cell after cycling at 4.0 V upper voltage).

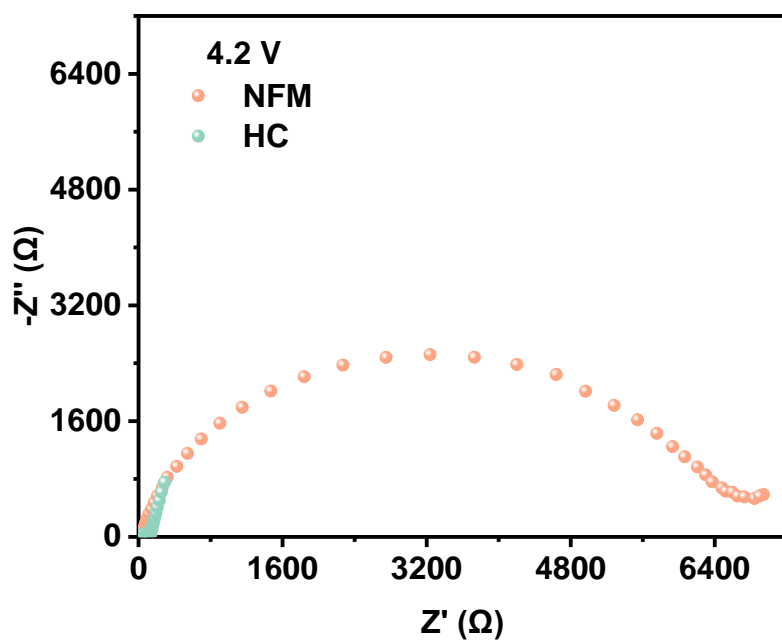

**Fig. S42** EIS results of Na || NFM and Na || HC half cells (the NFM and HC electrodes were from the pouch cell after cycling at 4.2 V upper voltage).

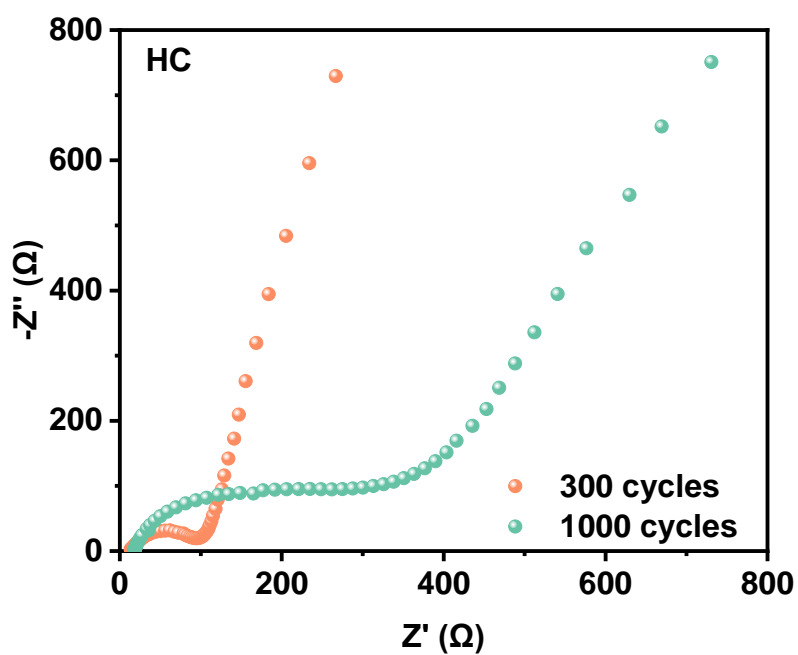

**Fig. S43** EIS results of Na || HC half cells (the HC electrodes were from HC || NFM pouch cells cycling at 4.0 V upper voltage).

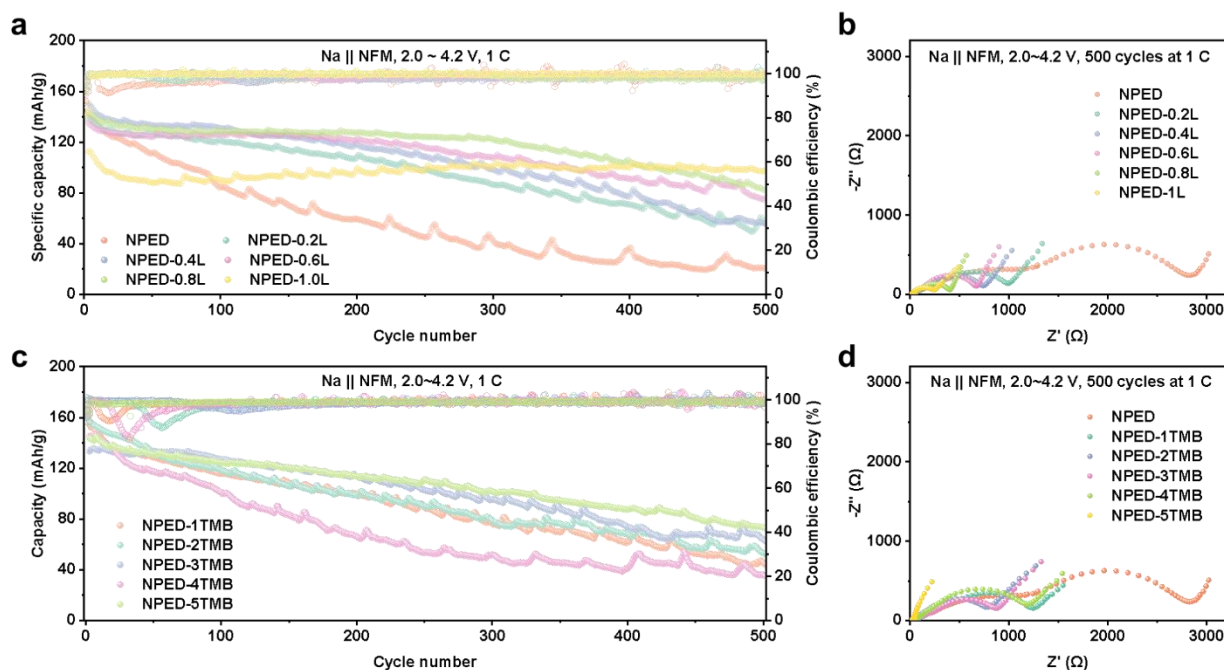

**Fig. S44** (a) Cycling performance and (b) EIS after 500 cycles of NFM in electrolytes with a series of LiDFOB with concentration gradients. (c) Cycling performance and (d) EIS after 500 cycles of NFM in electrolytes with a series of TMB with concentration gradients.

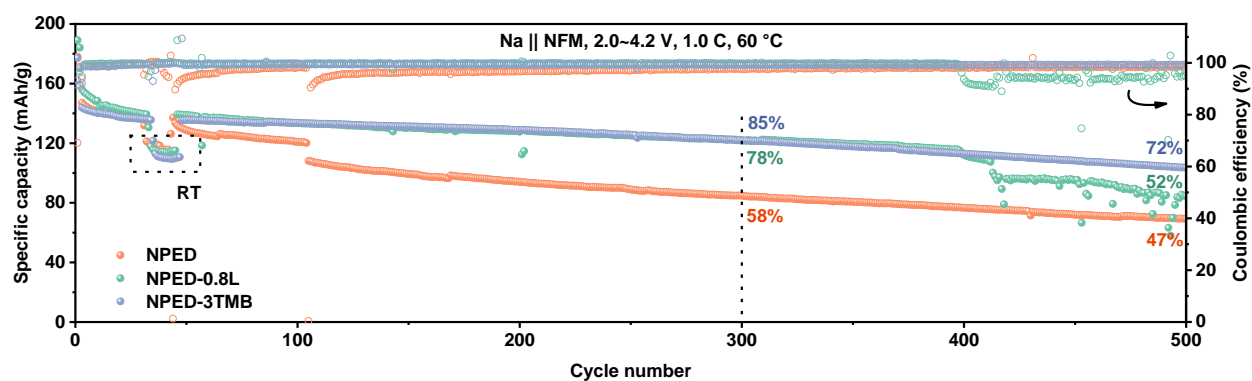

**Fig. S45** High-temperature cycling performance of NFM in NPED, NPED-0.8L and NPED-3TMB electrolytes at 4.2 V upper voltage (60 °C).

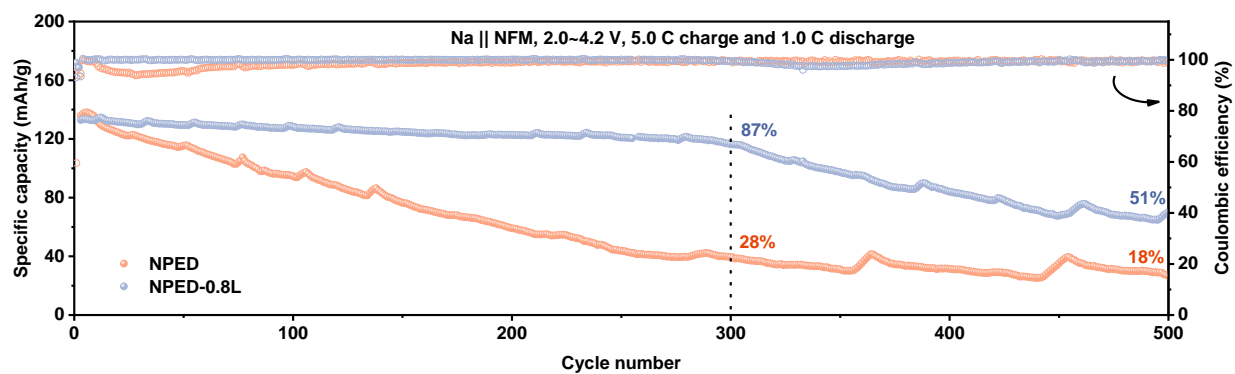

**Fig. S46** Fast-charge cycling of NFM in NPED and NPED-0.8L electrolytes at 4.2 V upper voltage (5.0 C current rate).

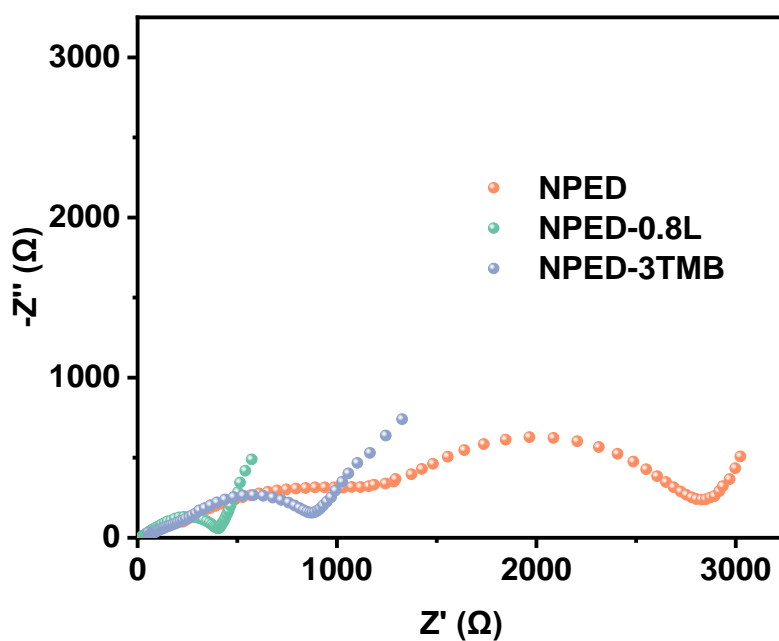

**Fig. S47** EIS results of Na || NFM after 500 cycles at 4.2 V upper voltage in NPED, NPED-0.8L and NPED-3TMB electrolytes.

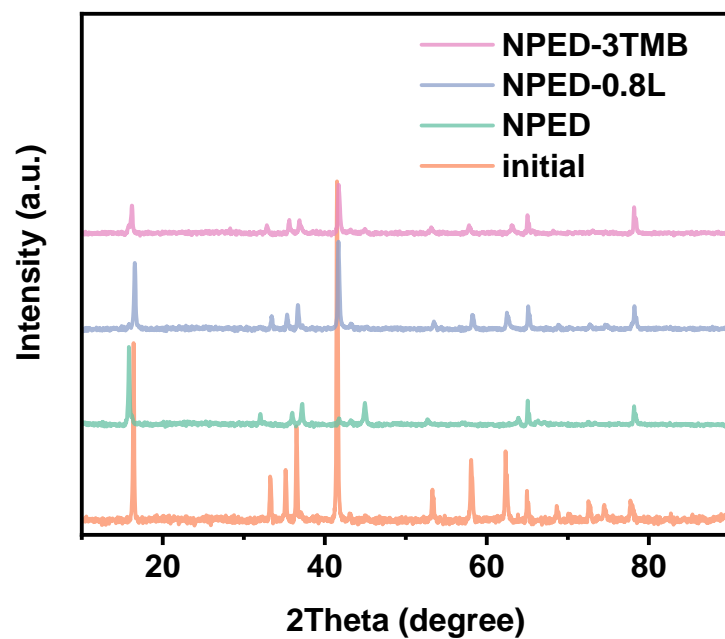

**Fig. S48** XRD patterns of NFM, pristine and after 500 cycles at 4.2 V upper voltage in NPED, NPED-0.8L and NPED-3TMB electrolytes.

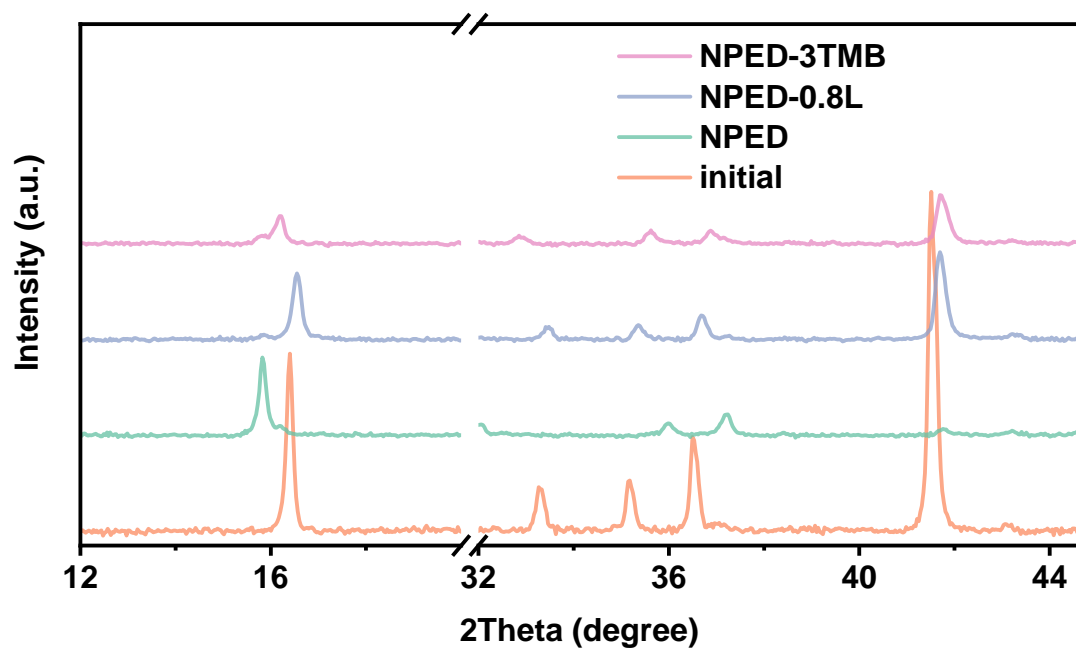

**Fig. S49** Local XRD patterns of Fig. S49.

**Table S1** Full-cell design parameters.

|                                                                                                                                         | cathode     | anode           |
|-----------------------------------------------------------------------------------------------------------------------------------------|-------------|-----------------|
| active materials                                                                                                                        | NFM         | HC              |
| mass ratio                                                                                                                              | 96%         | 95.5%           |
| conductive agent                                                                                                                        | C (Super P) | C (Super P)     |
| binder                                                                                                                                  | PVDF        | CMC, SBR        |
| solvent                                                                                                                                 | NMP         | deionized water |
| theoretical capacity<br>(mAh/g)                                                                                                         | 130         | 300             |
| active areal density<br>(mg/cm <sup>2</sup> )                                                                                           | 15.3        | 6.9             |
| rolled thickness (um)                                                                                                                   | 120         | 154             |
| Al foil thickness (um)                                                                                                                  | 12          | 12              |
| PE separator with 16-um thickness, NaPF <sub>6</sub> in EC/PC/DEC with FEC electrolyte, N/P<br>ratio=1.04 (areal capacity of HC to NFM) |             |                 |

**Table S2** (003) peak evolution during cycling of 3.8 V, 4.0 V and 4.2 V.

| charging cut-off voltage | state            | (003) peak shift versus initial | $d_{(003)}$ (nm) |
|--------------------------|------------------|---------------------------------|------------------|
| 3.8 V                    | initial          | 0                               | 0.550            |
|                          | fully charged    | -0.24°                          | 0.576            |
|                          | fully discharged | 0.03°                           | 0.550            |
| 4.0 V                    | initial          | 0                               | 0.548            |
|                          | fully charged    | -0.25°                          | 0.568            |
|                          | fully discharged | -0.03°                          | 0.546            |
| 4.2 V                    | initial          | 0                               | 0.546            |
|                          | fully charged    | 0.32°                           | 0.522            |
|                          | fully discharged | 0.07°                           | 0.540            |

**Table S3** Fitted impedances from Nyquist plots at different charging cut-off voltages during cycling.

| charging cut-off<br>voltage | cycle number | $R_s$ ( $\Omega$ ) | $R_{CEI}$ ( $\Omega$ ) | $R_{ct}$ ( $\Omega$ ) |
|-----------------------------|--------------|--------------------|------------------------|-----------------------|
| 3.8 V                       | 50           | 5.285              | 46.48                  | 68.41                 |
|                             | 100          | 14.5               | 32.21                  | 118.4                 |
|                             | 200          | 8.145              | 51.71                  | 158.3                 |
|                             | 300          | 5.351              | 54.67                  | 214.7                 |
| 4.0 V                       | 50           | 8.154              | 25.96                  | 168.4                 |
|                             | 100          | 12.66              | 31.64                  | 330.2                 |
|                             | 200          | 6.536              | 37.67                  | 361.6                 |
|                             | 300          | 5.536              | 53.49                  | 470                   |
| 4.2 V                       | 50           | 4.041              | 19.54                  | 795.9                 |
|                             | 100          | 11.89              | 28.4                   | 1281                  |
|                             | 200          | 8.231              | 32.41                  | 1677                  |
|                             | 300          | 13.96              | 50.03                  | 1754                  |



## Reference

1. M. Jeong, *Journal of Power Sources*.
2. J. Liu, Y. You, L. Huang, Q. Zheng, Z. Sun, K. Fang, L. Sha, M. Liu, X. Zhan, J. Zhao, Y.-C. Han, Q. Zhang, Y. Chen, S. Wu and L. Zhang, *Advanced Materials*, 2024, **36**, 2407369.
3. S. Qiu, L. Xiao, M. L. Sushko, K. S. Han, Y. Shao, M. Yan, X. Liang, L. Mai, J. Feng, Y. Cao, X. Ai, H. Yang and J. Liu, *Advanced Energy Materials*, 2017, **7**, 1700403.
4. S. Stankovich, D. A. Dikin, R. D. Piner, K. A. Kohlhaas, A. Kleinhammes, Y. Jia, Y. Wu, S. T. Nguyen and R. S. Ruoff, *Carbon*, 2007, **45**, 1558–1565.
